# Supplementary material
Source: publisher figshare collection journal article supplement (https://acs.figshare.com/ndownloader/files/12560228)
Supplement: Supplementary file 1 [file 12560228]

Supporting information for:

## **Microporous humins synthesized in concentrated sulfuric acid using 5-hydroxymethyl furfural**

Fredrik Björnerbäck<sup>†</sup>, Diana Bernin<sup>†,‡</sup>, Niklas Hedin<sup>†,\*</sup>

<sup>†</sup>Department of Materials and Environmental Chemistry, Arrhenius laboratory, Stockholm University, SE-106 91 Stockholm, Sweden

<sup>‡</sup>present address for Diana Bernin: Department of Chemistry and Chemical Engineering, Chalmers University of Technology, SE-41296 Gothenburg, Sweden

## Table of contents

### Supplementary figures

|                                                                               |     |
|-------------------------------------------------------------------------------|-----|
| Figure S1. Reproducibility of MHH-4 using CO <sub>2</sub> sorption isotherms  | S4  |
| Figure S2. Reproducibility of MHH-2 using CO <sub>2</sub> sorption isotherms  | S4  |
| Figure S3. Solid state nuclear magnetic resonance CP and DP spectra for MHH-2 | S5  |
| Figure S4. FTIR for MHH-2 and MHH-4                                           | S5  |
| Figure S5. Raman spectroscopy study for MHH-2 at 532 nm                       | S6  |
| Figure S6. Raman spectroscopy study for MHH-4 at 532 nm                       | S6  |
| Figure S7. Raman spectroscopy study for MHH-2 at 785nm                        | S7  |
| Figure S8. Raman spectroscopy study for MHH-4 at 785nm                        | S7  |
| Figure S9. Thermogravimetric analyses for MHH-2 and MHH-4                     | S8  |
| Figure S10. DFT Cumulative pore volumes                                       | S8  |
| Figure S11. DFT Pore size distributions                                       | S9  |
| Figure S12. Dubinin-Radushkevich plots                                        | S9  |
| Figure S13. SEM images of MHH-2                                               | S10 |
| Figure S14. SEM images of MHH-2                                               | S11 |
| Figure S15. Sorption isotherms at 50 °C of N <sub>2</sub> and CO <sub>2</sub> | S12 |
| Figure S16. CO <sub>2</sub> uptake at 0, 10, 20 and 50 °C for MHH-2           | S12 |
| Figure S17. CO <sub>2</sub> uptake at 0, 10, 20 and 50 °C for MHH-4           | S13 |
| Figure S18. Sorption isosters of CO <sub>2</sub> for MHH-2                    | S13 |
| Figure S19. Sorption isosters of CO <sub>2</sub> for MHH-4                    | S14 |
| Figure S20. <i>t</i> -plots                                                   | S14 |

### Supplementary tables

|                                                                                                               |     |
|---------------------------------------------------------------------------------------------------------------|-----|
| Table S1. Elemental compositions                                                                              | S15 |
| Table S2. CO <sub>2</sub> and CH <sub>4</sub> uptake and apparent selectivities                               | S16 |
| Table S3. CO <sub>2</sub> uptake, selectivity and Q <sub>st</sub> comparison to other organic porous sorbents | S17 |
| Table S4. Regression analyses of adsorption data for use in IAST calculations                                 | S19 |
| Table S5. Heat of sorption for MHH-2                                                                          | S20 |
| Table S6. Heat of sorption for MHH-4                                                                          | S21 |

### Supplementary calculations

|                                                         |     |
|---------------------------------------------------------|-----|
| IAST calculations                                       | S22 |
| Heat of sorption calculations                           | S22 |
| Dubinin-Radushkevich (DR) micropore volume calculations | S23 |

|                                |     |
|--------------------------------|-----|
| BET calculations               | S23 |
| $t$ -plot method calculations  | S24 |
| Total pore volume calculations | S24 |
| <b>References</b>              | S25 |

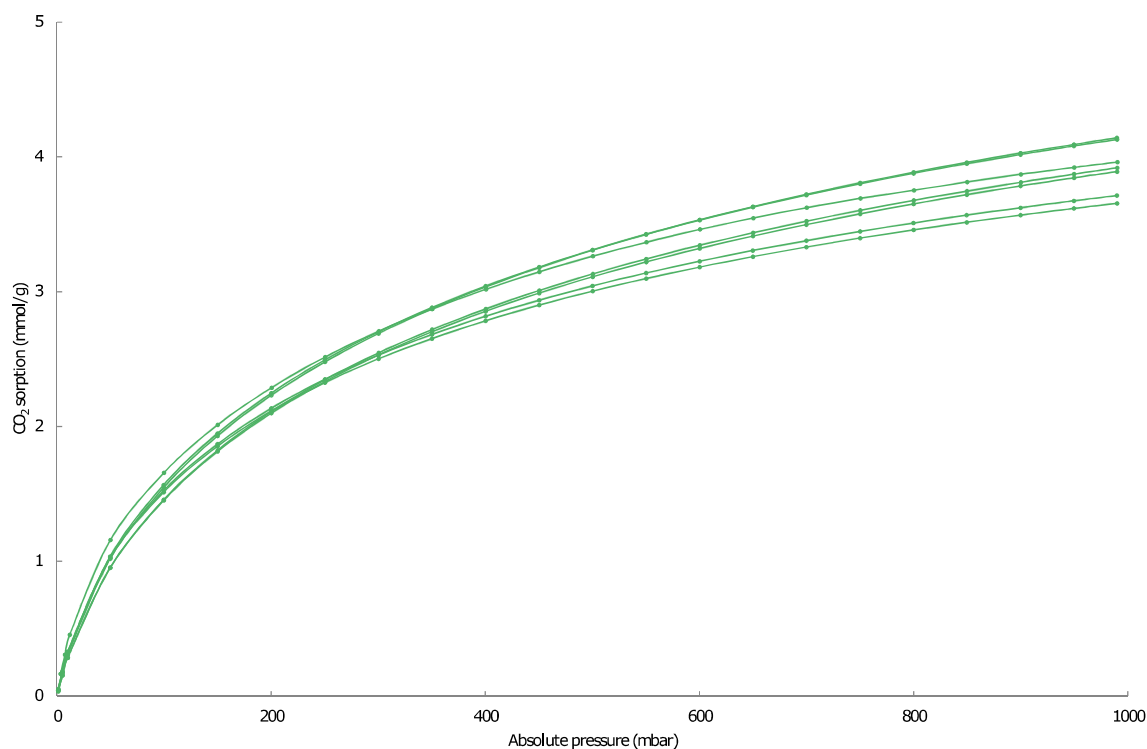

Figure S1. Reproducibility the CO<sub>2</sub> sorption isotherms for seven different MHH-4 samples recorded at 0 °C. Note, the isotherms were recorded on a different device (Micromeritics Gemini VII) than those presented in the main manuscript. The preparation of the samples were performed by degassing in a flow of dry N<sub>2</sub> at a temperature of 400 °C. The data is not directly comparable to the corresponding sorption data presented in the main manuscript; however, it supports the reproducibility of the MHH-4 synthesis.

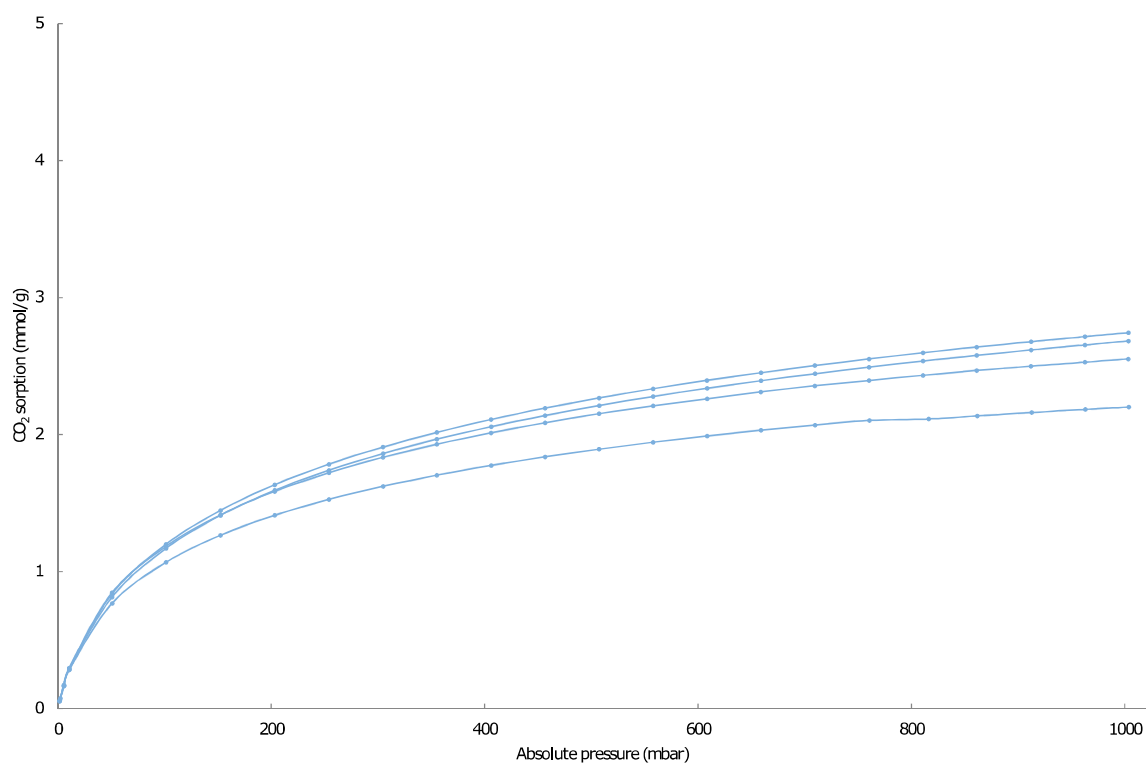

Figure S2. Reproducibility the CO<sub>2</sub> sorption isotherms for four different MHH-2 samples recorded at 0 °C. Note, the isotherms were recorded on a different device (Micromeritics Gemini VII) than those presented in the main manuscript. The preparation of the samples were performed by degassing in a flow of dry N<sub>2</sub> at a temperature of 200 °C. The data is not directly comparable to the corresponding sorption data presented in the main manuscript; however, it supports the reproducibility of the MHH-2 synthesis.

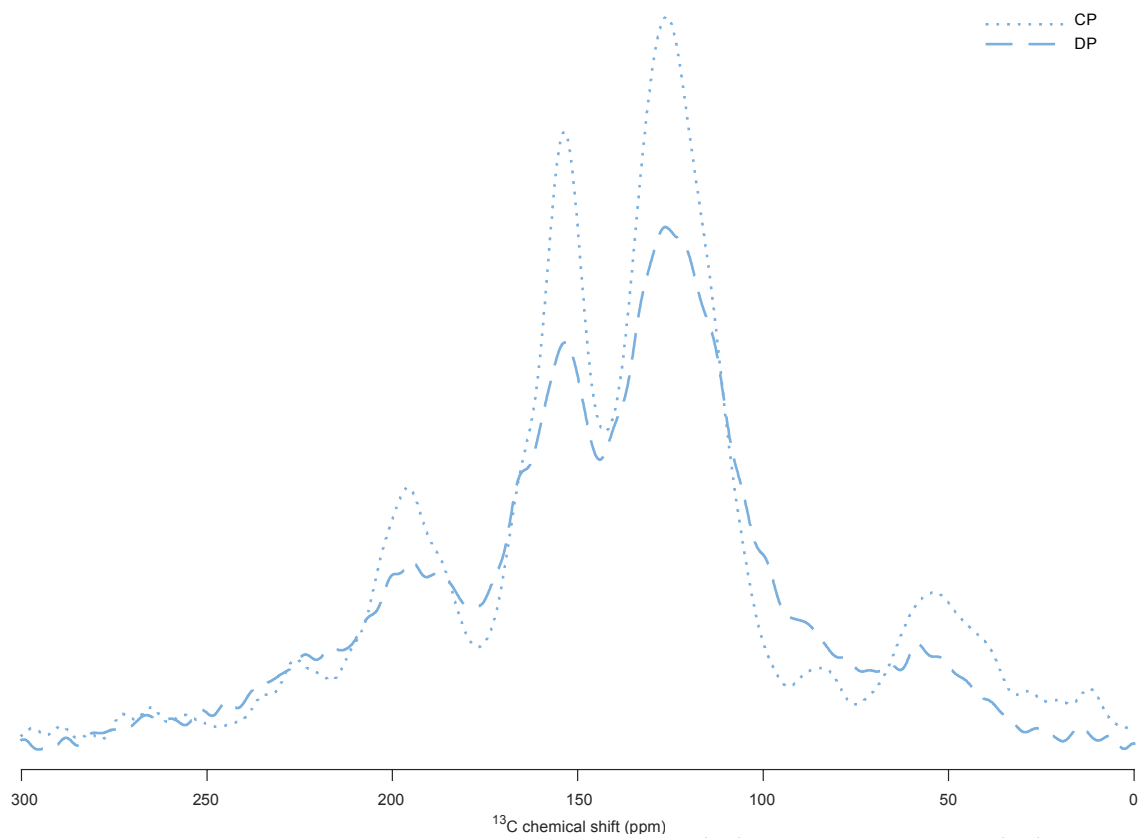

Figure S3. Solid state nuclear magnetic resonance crosspolarization (CP) and direct polarization (DP) spectra for MHH-2.

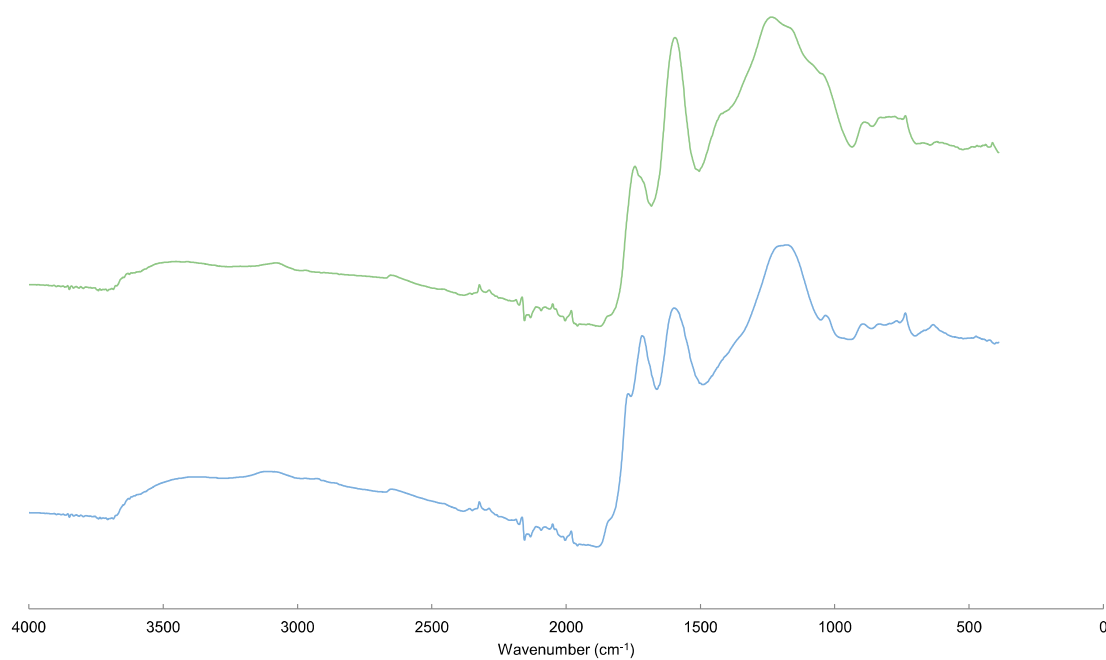

Figure S4. Fourier transform infrared spectra recorded on MHH-2 (blue) and MHH-4 (green) using an attenuated total reflection device and presented in its quasi-absorbance mode.

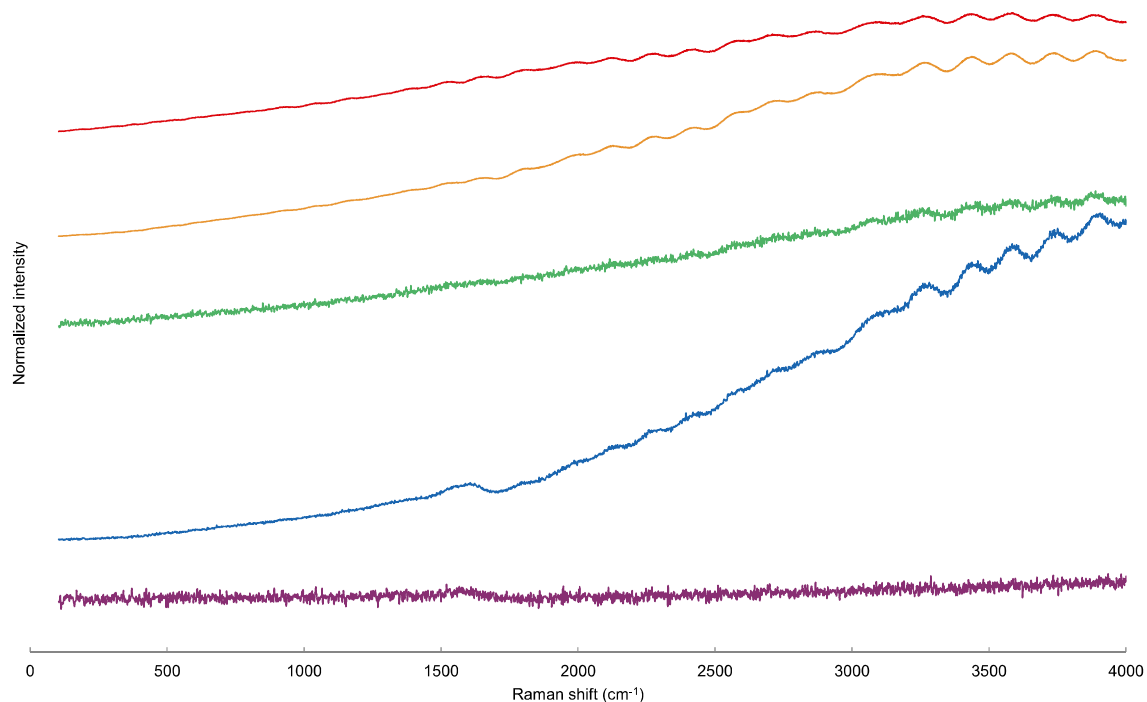

Figure S5. Raman spectra of MHH-2 recorded with an excitation laser wavelength of 532 nm. The analysis was performed sequentially with a focus on the same spot of the sample and with varied laser power. The run order corresponds to the spectra in the figure from the bottom and up with laser powers of 0.005 mW (purple), 0.056 mW (blue), 0.005 mW (green), 0.56 mW (yellow), and 0.056 mW (red).

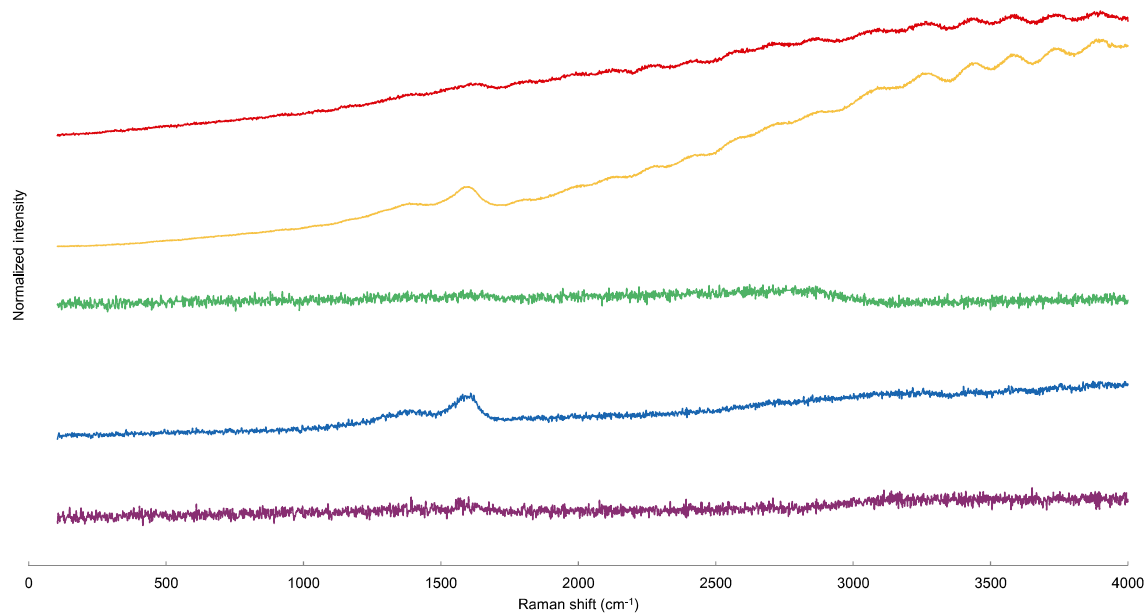

Figure S6. Raman spectra of MHH-4 recorded with an excitation laser wavelength of 532 nm. The analysis was performed sequentially with a focus on the same spot of the sample and with varied laser power. The run order corresponds to the spectra in the figure from the bottom and up with laser powers of 0.005 mW (purple), 0.056 mW (blue), 0.005 mW (green), 0.56 mW (yellow), and 0.056 mW (red).

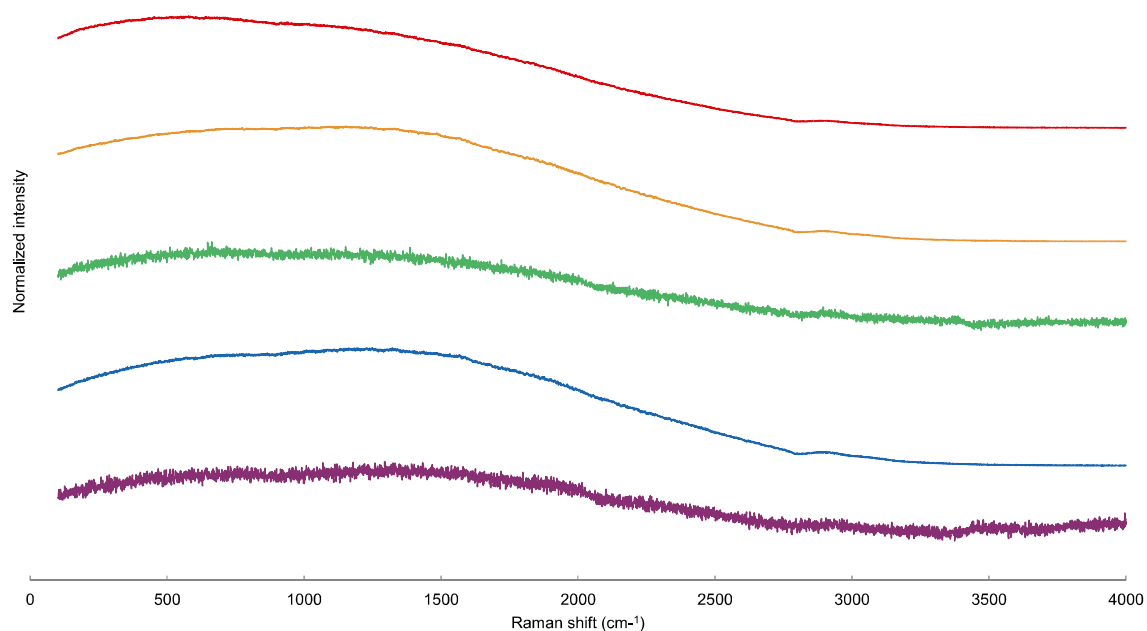

Figure S7. Raman spectra of MHH-2 recorded with an excitation laser wavelength of 785 nm. The analysis was performed sequentially with a focus on the same spot of the sample and with varied laser power. The run order corresponds to the spectra in the figure from the bottom and up with laser powers of 0.0088 mW (purple), 0.088 mW (blue), 0.0088 mW (green), 0.88 mW (yellow), and 0.088 mW (red).

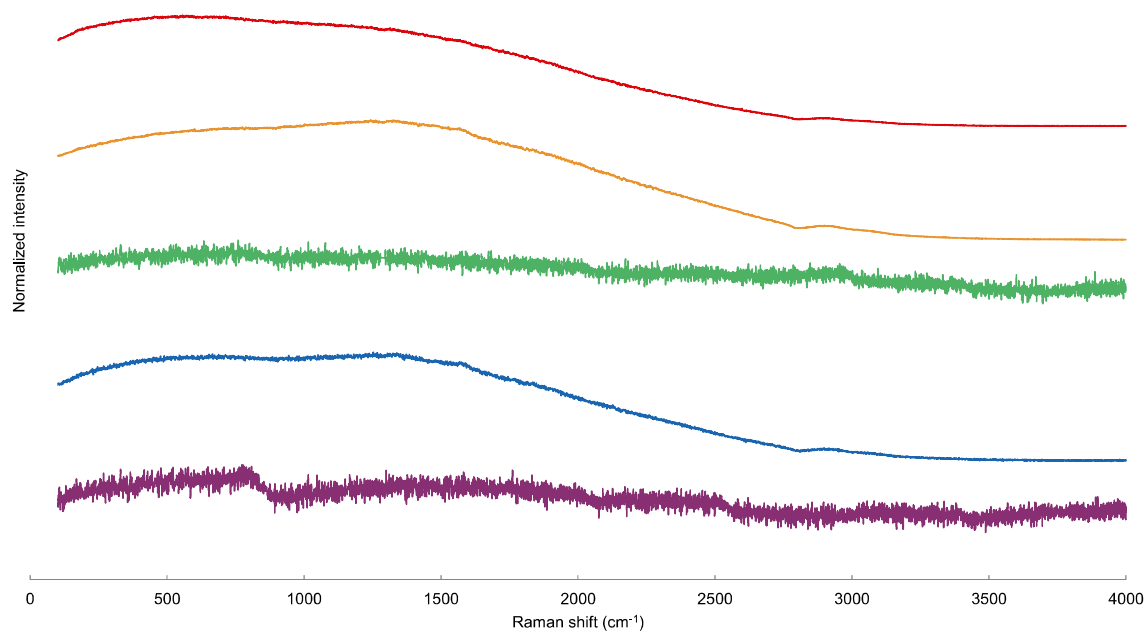

Figure S8. Raman spectra of MHH-4 recorded with an excitation laser wavelength of 785 nm. The analysis was performed sequentially with a focus on the same spot of the sample and with varied laser power. The run order corresponds to the spectra in the figure from the bottom and up with laser powers of 0.0088 mW (purple), 0.088 mW (blue), 0.0088 mW (green), 0.88 mW (yellow), and 0.088 mW (red).

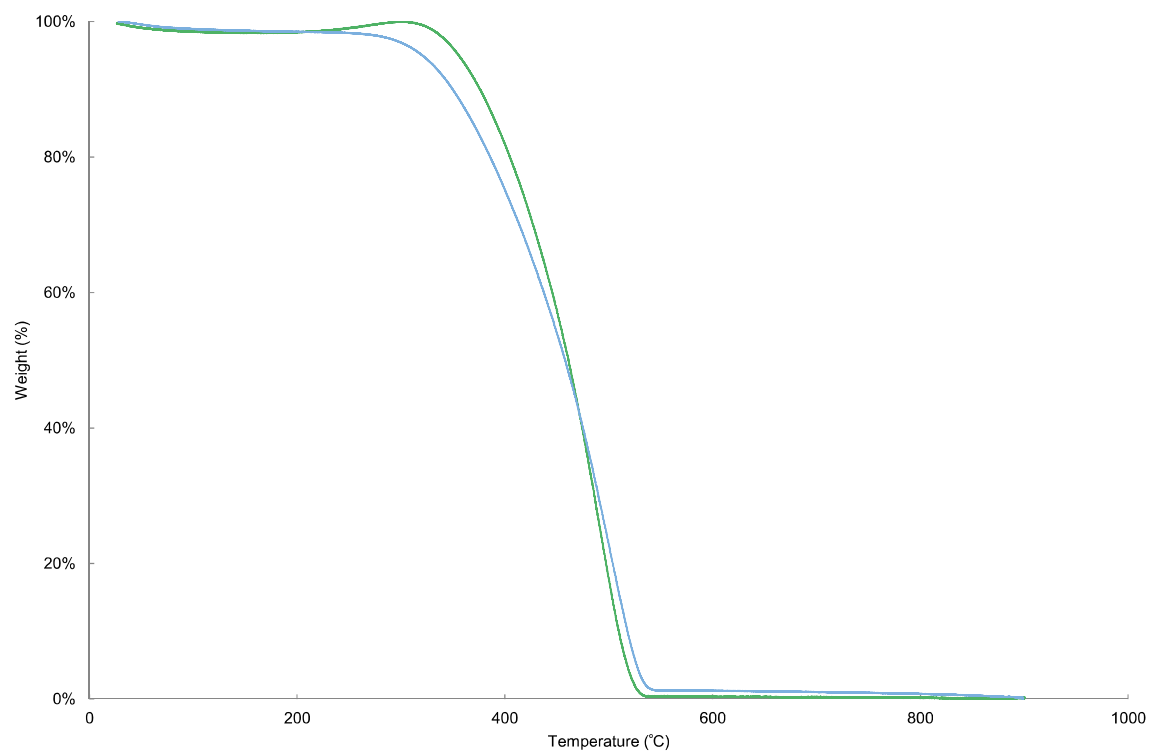

Figure S9. Thermogravimetric analyses of and the MHH-2 (blue) and MHH-4 (green) samples at a heating rate of 1 °C/minute. The experimental data has been normalized.

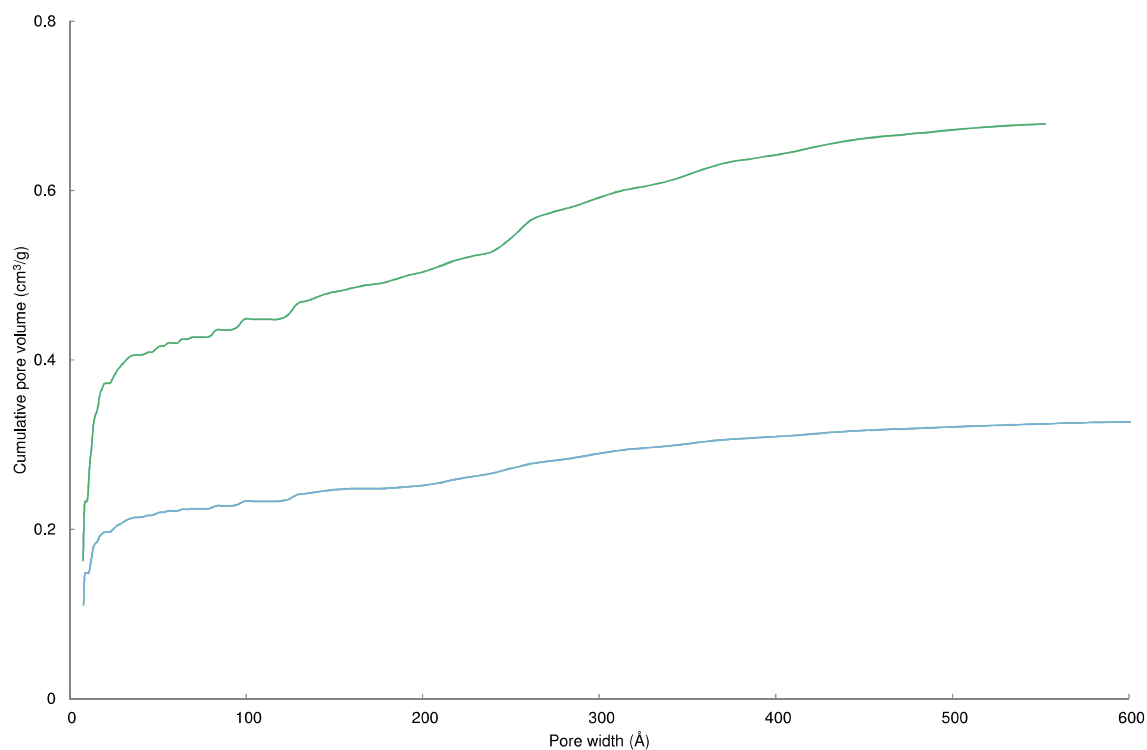

Figure S10. Cumulative pore volume for MHH-2 (blue) and MHH-4 (green) using N<sub>2</sub> adsorption data and a density functional theory through Micromeritics' routines for carbon slit-shaped pores.



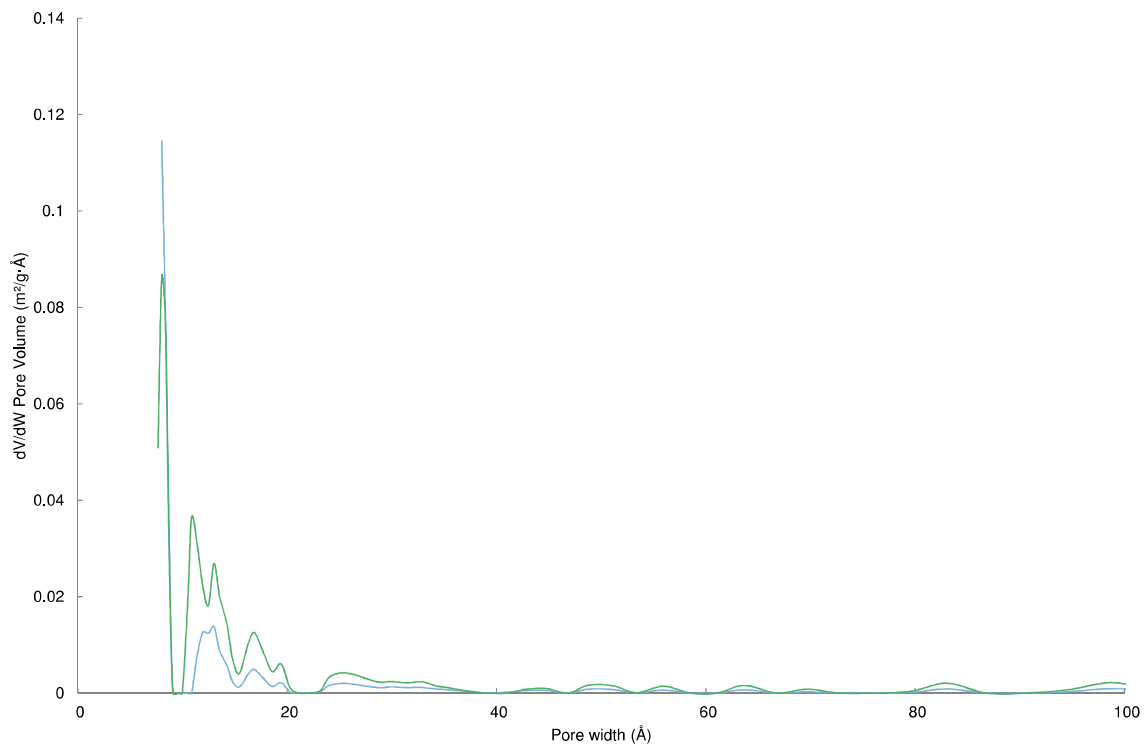

Figure S11. Pore size distributions for MHH-2 (blue) and MHH-4 (green) using  $N_2$  adsorption data and a density functional theory through Micromeritics' routines for carbon slit-shaped pores.

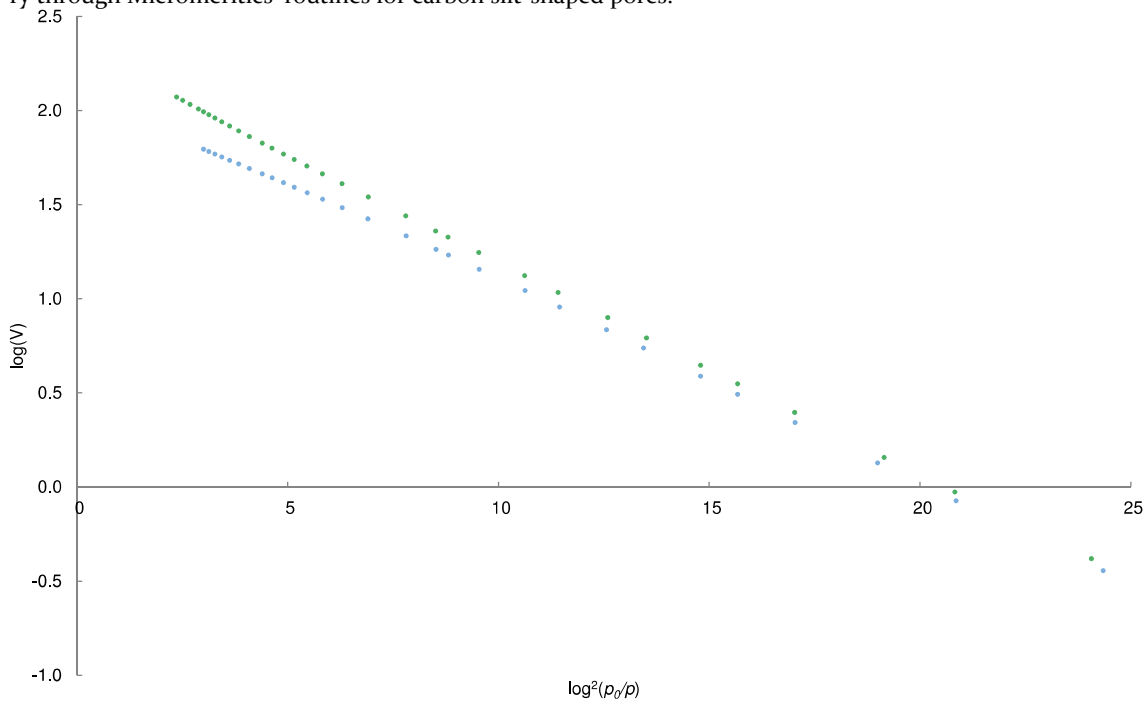

Figure S12. Dubinin-Radushkevich plots using  $N_2$  adsorption data for MHH-2 (blue) and MHH-4 (green) with  $p/p_0$  interval  $1.24 \cdot 10^{-5} - 0.02$ ; corresponding to micropore volumes of 0.25 and 0.39  $\text{cm}^3/\text{g}$  for MHH-2 and MHH-4, respectively.

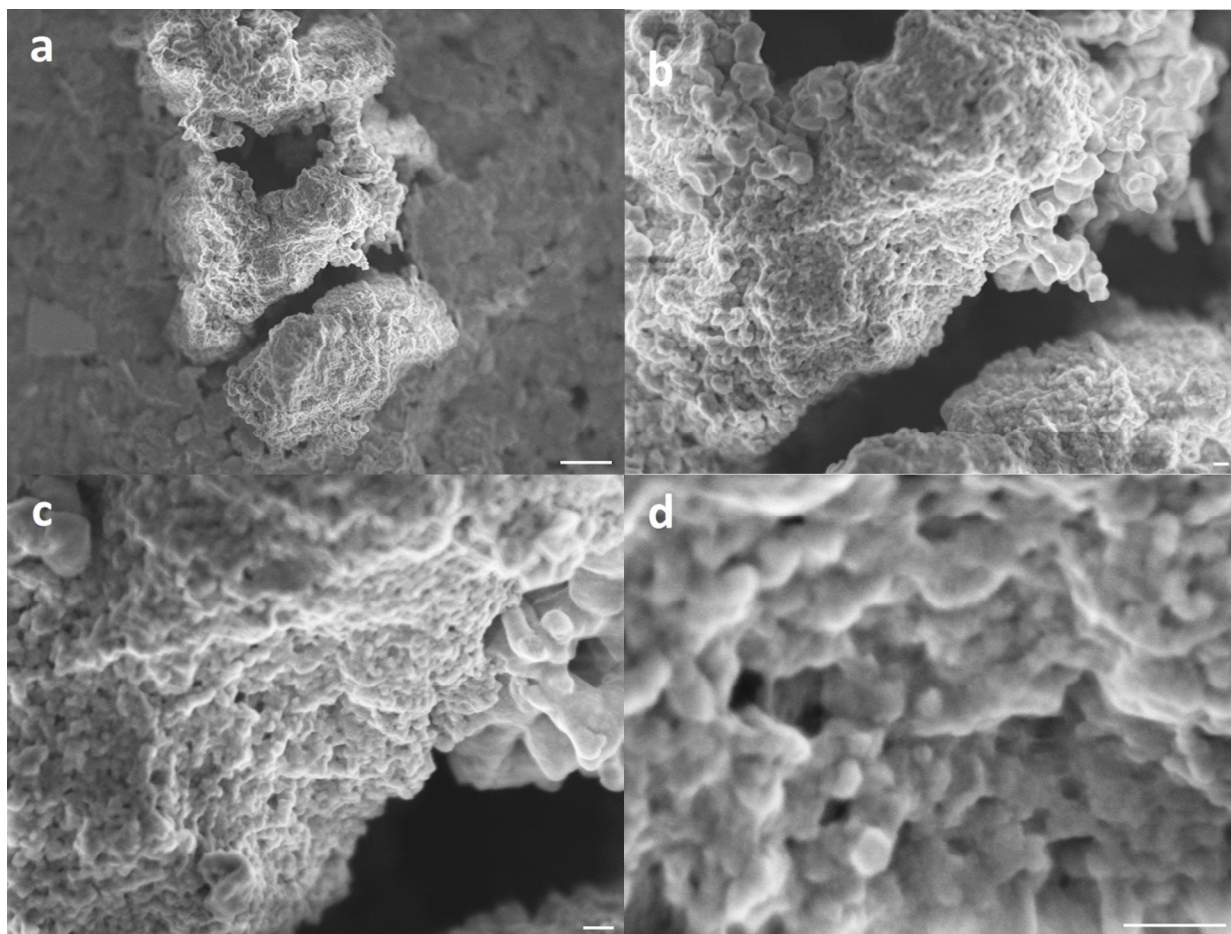

Figure S13. SEM images of one MHH-2 particle. Magnifications of 10,000x with a scale bar of 1  $\mu\text{m}$  (a), 30,000x with a scale bar of 100 nm (b), 60,000x with a scale bar of 100 nm (c) and 200,000x with a scale bar of 100 nm (d).

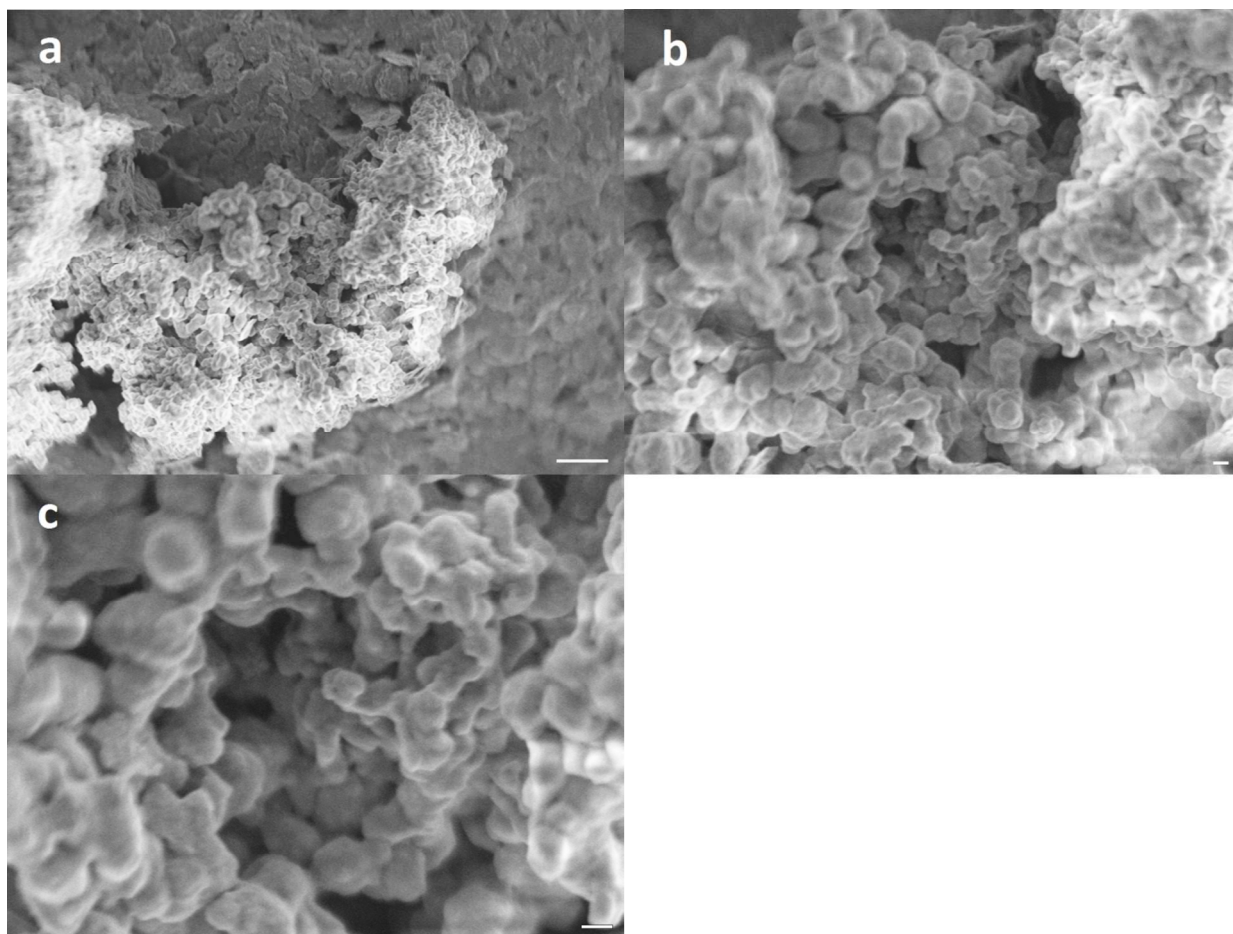

Figure S14. SEM images of a second MHH-2 particle. Magnifications of 10,000x with a scale bar of 1  $\mu\text{m}$  (a), 30,000x with a scale bar of 100 nm (b) and 60,000x with a scale bar of 100 nm (c; same as Figure 5a).

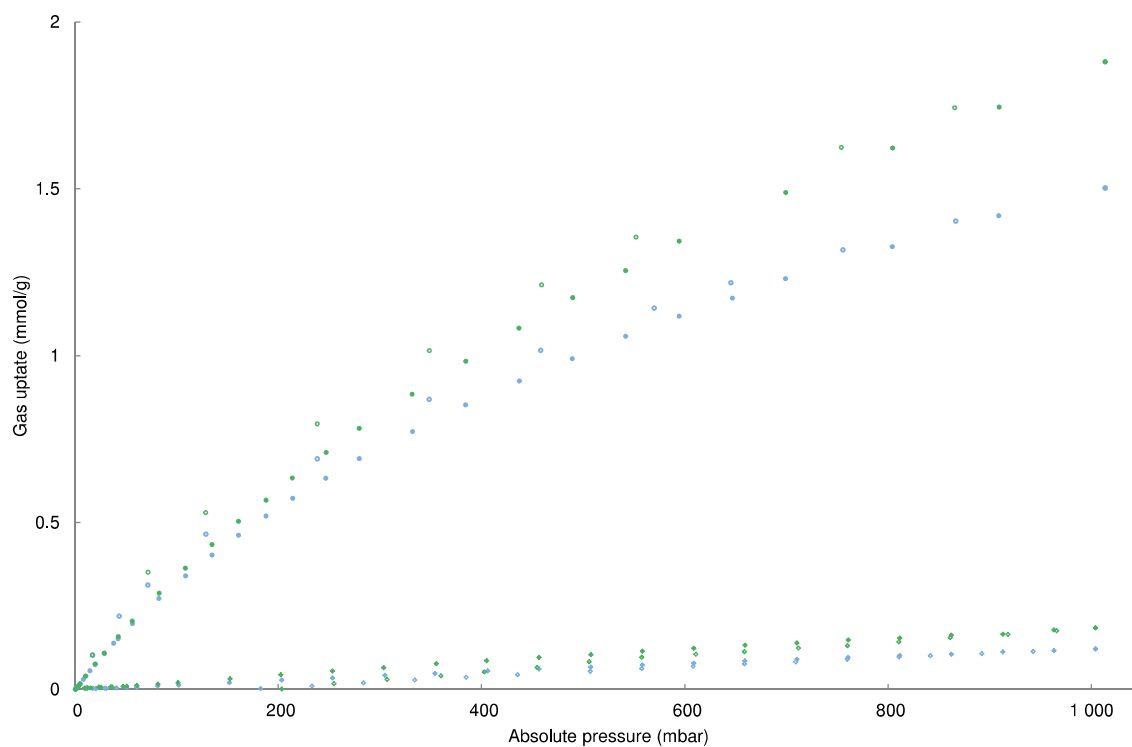

Figure S15. Adsorption and desorption isotherms at 50 °C of N<sub>2</sub> (diamonds) and CO<sub>2</sub> (circles) for MHH-2 (blue) and MHH-4 (green). Filled symbols = adsorption isotherms, empty symbols = desorption isotherms.

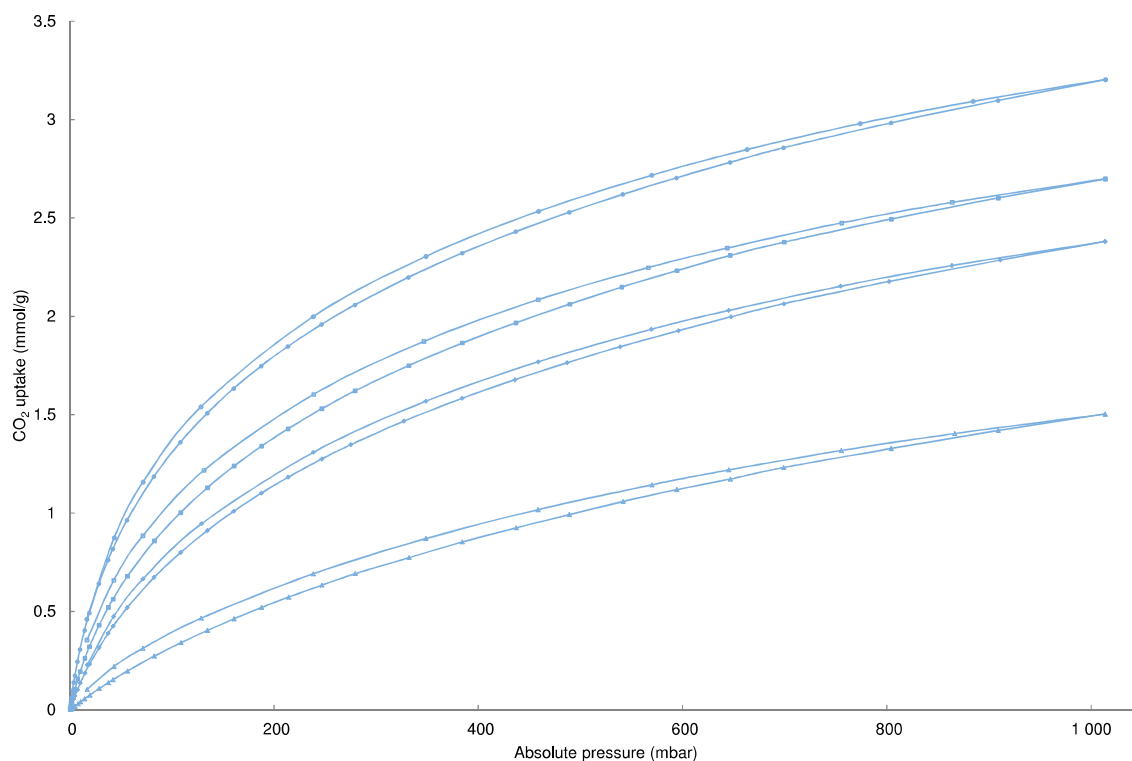

Figure S16. The CO<sub>2</sub> sorption and desorption isotherms recorded at temperatures of 0 (circle), 10 (square), 20 (diamond) and 50 °C (triangle) for MHH-2. Filled symbols = sorption isotherms, empty symbols = desorption isotherms.

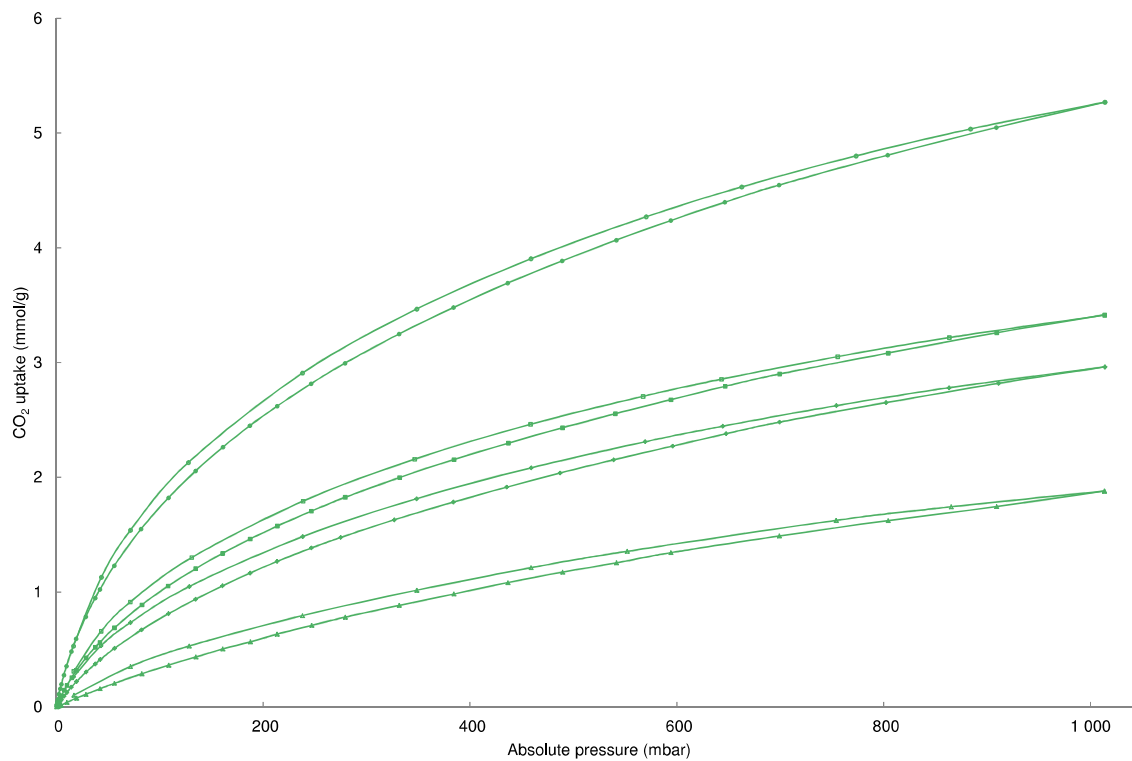

Figure S17. The CO<sub>2</sub> sorption and desorption isotherms recorded at temperatures of 0 (circle), 10 (square), 20 (diamond) and 50 °C (triangle) for MHH-4. Filled symbols = sorption isotherms, empty symbols = desorption isotherms.

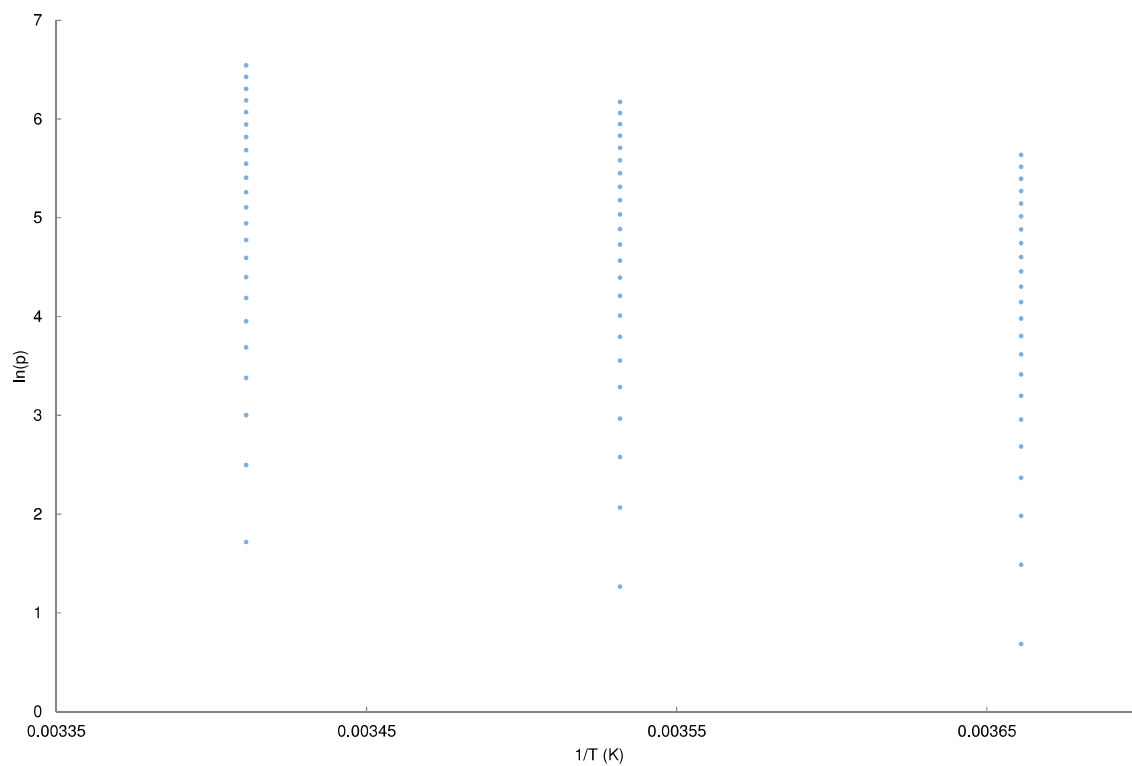

Figure S18. Sorption isosters of CO<sub>2</sub> for MHH-2, calculated from the adsorption isotherm data recorded at temperatures of 0, 10 and 20 °C.

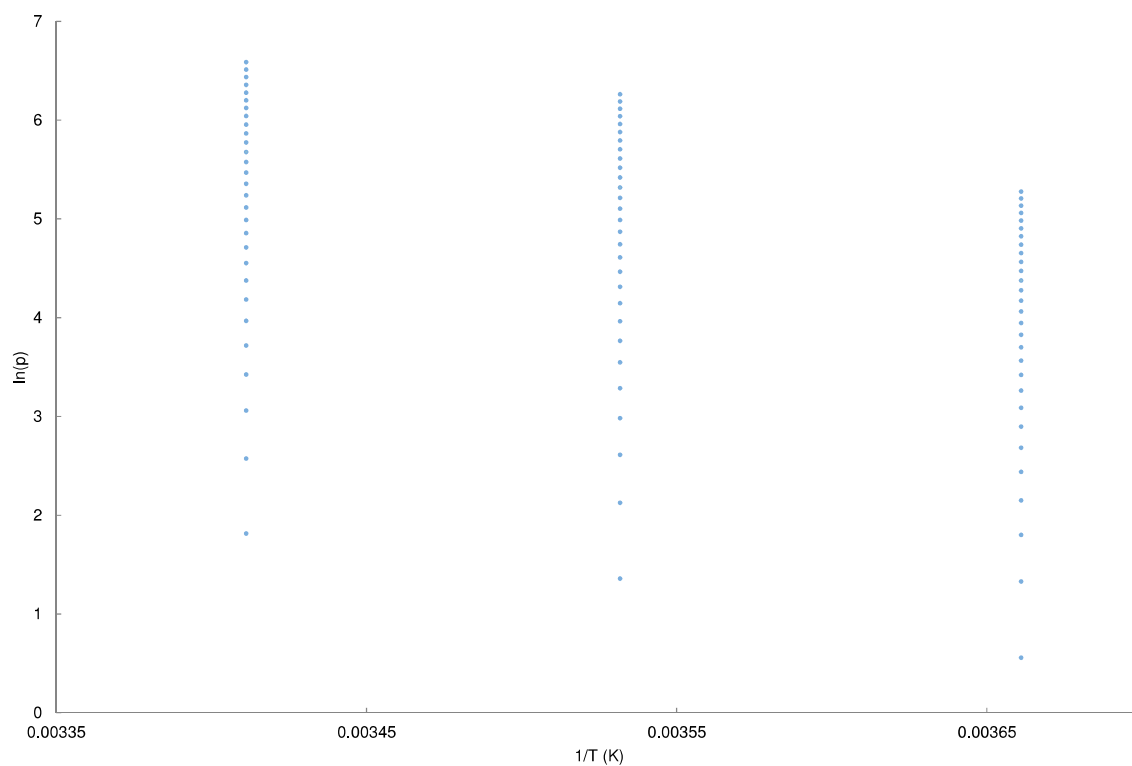

Figure S19. Sorption isosters of CO<sub>2</sub> for MHH-4, calculated from adsorption isotherm data recorded at temperatures of 0, 10 and 20 °C.

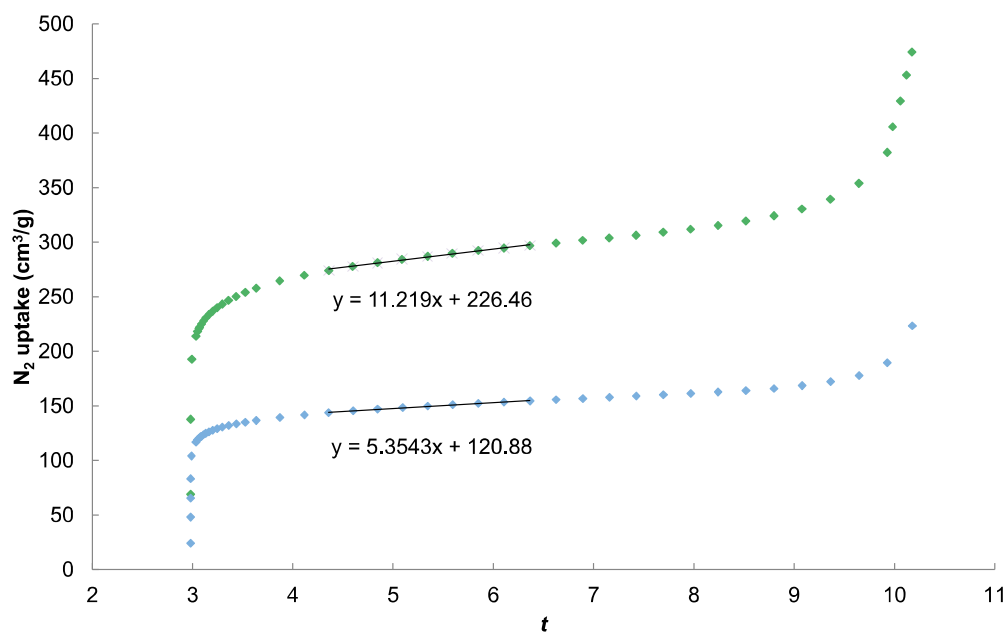

Figure S20. *t*-plot for MHH-2 (blue) and MHH-4 (green) with formulas for linear regressions using selected points.

**Table S1. Elemental compositions.**

| Name, starting material(s), ratio of starting materials, synthesis details etc.                                                        | C (wt. %) | H (wt. %) | N (wt. %) | O (wt. %) | S (wt. %) | H/C atomic ratio | O/C atomic ratio | Ref.          |
|----------------------------------------------------------------------------------------------------------------------------------------|-----------|-----------|-----------|-----------|-----------|------------------|------------------|---------------|
| MHH-2                                                                                                                                  | 60.08     | 3.05      | <0.10     | 36.18*    | 0.69      | 0.60             | 0.45             | This work     |
| MHH-4                                                                                                                                  | 73.91     | 2.81      | <0.10     | 22.86*    | 0.42      | 0.45             | 0.23             | This work     |
| Solid acids synthesized with H <sub>2</sub> SO <sub>4</sub>                                                                            |           |           |           |           |           |                  |                  |               |
| Naphthalene                                                                                                                            | 53.5      | 1.6       | -         | 24.9      | 20.0      | 0.35             | 0.35             | <sup>1</sup>  |
| Lignin                                                                                                                                 | 54.3      | 3.6       | 2.1       | 36.2      | 3.9       | 0.78             | 0.50             | <sup>2</sup>  |
| HTC of Lapsi seeds                                                                                                                     | 62.1      | -         | -         | -         | -         | -                | -                | <sup>3</sup>  |
| HTC of Glucose                                                                                                                         | 79.5      | 4.3       | -         | 9.8       | 6.4       | 0.64             | 0.09             | <sup>4</sup>  |
| Saccharide humins synthesized with H <sub>2</sub> SO <sub>4</sub>                                                                      |           |           |           |           |           |                  |                  |               |
| HMF                                                                                                                                    | 61.2      | 4.5       | -         | 34.3*     | -         | 0.88             | 0.42             | <sup>5</sup>  |
| Glucose                                                                                                                                | -         | -         | -         | -         | -         | 0.79             | 0.36             | <sup>6</sup>  |
| Fructose                                                                                                                               | -         | -         | -         | -         | -         | 0.76             | 0.36             | <sup>6</sup>  |
| Xylose                                                                                                                                 | -         | -         | -         | -         | -         | 0.68             | 0.33             | <sup>6</sup>  |
| Glucose/fructose 1:1                                                                                                                   | -         | -         | -         | -         | -         | 0.77             | 0.35             | <sup>6</sup>  |
| Glucose/fructose/xylose 1:1:1                                                                                                          | -         | -         | -         | -         | -         | 0.74             | 0.34             | <sup>6</sup>  |
| Glucose/HMF 1:0.2                                                                                                                      | -         | -         | -         | -         | -         | 0.76             | 0.34             | <sup>6</sup>  |
| Glucose/1,2,4-trihydroxybenzene 1:0.2                                                                                                  | -         | -         | -         | -         | -         | 0.70             | 0.39             | <sup>6</sup>  |
| Glucose/1,2,4-trihydroxybenzene 1:0.01                                                                                                 | -         | -         | -         | -         | -         | 0.78             | 0.39             | <sup>6</sup>  |
| Glucose                                                                                                                                | 66.4      | 4.7       | -         | 28.9      | -         | 0.84             | 0.33             | <sup>7</sup>  |
| Mannose                                                                                                                                | 65.7      | 4.7       | -         | 29.6      | -         | 0.85             | 0.34             | <sup>7</sup>  |
| Galactose                                                                                                                              | 66.1      | 4.7       | -         | 29.2      | -         | 0.85             | 0.33             | <sup>7</sup>  |
| Arabinose                                                                                                                              | 68.3      | 4.9       | -         | 26.8      | -         | 0.85             | 0.29             | <sup>7</sup>  |
| Cellobiose                                                                                                                             | 65.1      | 5.1       | -         | 29.8      | -         | 0.93             | 0.34             | <sup>7</sup>  |
| Methyl- $\alpha$ -glucose                                                                                                              | 66.1      | 4.9       | -         | 28.9      | -         | 0.88             | 0.33             | <sup>7</sup>  |
| Glucose, 180 °C, 0.01M H <sub>2</sub> SO <sub>4</sub> , Helium, various heat treatments. Data adapted from figure in ref. <sup>8</sup> |           |           |           |           |           |                  |                  |               |
| Glucose, 180 °C, 0.01M H <sub>2</sub> SO <sub>4</sub> , Helium                                                                         | 66.3      | 4.4       | -         | 29.3      | -         | 0.79             | 0.33             | <sup>8</sup>  |
| 110 °C                                                                                                                                 | -         | -         | -         | -         | -         | 0.8              | 0.34             | <sup>8</sup>  |
| 400 °C                                                                                                                                 | -         | -         | -         | -         | -         | 0.6              | 0.21             | <sup>8</sup>  |
| 500 °C                                                                                                                                 | -         | -         | -         | -         | -         | 0.5              | 0.16             | <sup>8</sup>  |
| 600 °C                                                                                                                                 | -         | -         | -         | -         | -         | 0.38             | 0.07             | <sup>8</sup>  |
| 700 °C                                                                                                                                 | -         | -         | -         | -         | -         | 0.28             | 0.05             | <sup>8</sup>  |
| Saccharide humins                                                                                                                      |           |           |           |           |           |                  |                  |               |
| HMF, 27.5 MPa, 290-400 °C.                                                                                                             | 57.1      | 4.8       | -         | 38.1      | -         | 1.00             | 0.50             | <sup>9</sup>  |
| HMF, 190 °C, pH 2.5                                                                                                                    | 58        | 3.0       | -         | 39*       | -         | 0.62             | 0.50             | <sup>10</sup> |
| Glucose, 190 °C, pH 2                                                                                                                  | 62        | -         | -         | -         | -         | -                | -                | <sup>10</sup> |
| Glucose, 190 °C, pH 4                                                                                                                  | 58        | -         | -         | -         | -         | -                | -                | <sup>10</sup> |
| Humins, based on 26 samples from soil. Details and Van Krevelen diagram in ref. <sup>11</sup>                                          |           |           |           |           |           |                  |                  |               |
| Soil humins (range)                                                                                                                    | 48-62     | 4.2-7.3   | 0.9-6.0   | 28-45     | 0.1-0.9   | 0.82-1.72        | 0.37-0.61        | <sup>11</sup> |
| Activated carbons, pyrolysis or physical activation                                                                                    |           |           |           |           |           |                  |                  |               |
| Rice husk, 350 °C, Ar                                                                                                                  | 44.2      | 2.5       | 0.65      | 17.0*     | -         | 0.67             | 0.29             | <sup>12</sup> |
| Rice husk, 450 °C, Ar                                                                                                                  | 45.5      | 1.9       | 0.65      | 11.6*     | -         | 0.50             | 0.19             | <sup>12</sup> |
| Rice husk, 550 °C, Ar                                                                                                                  | 47.0      | 2.0       | 0.68      | 8.1*      | -         | 0.51             | 0.13             | <sup>12</sup> |
| Palm shell, 700 °C, N <sub>2</sub>                                                                                                     | 83.6      | 0.8       | 0.6       | 15.0*     | -         | 0.11             | 0.13             | <sup>13</sup> |
| Palm shell, 700 °C, N <sub>2</sub> , 800 °C, CO <sub>2</sub>                                                                           | 87.1      | 1.0       | 1.1       | 10.8*     | -         | 0.14             | 0.09             | <sup>13</sup> |
| Activated carbons, chemical activation                                                                                                 |           |           |           |           |           |                  |                  |               |
| Rice husk, 350 °C, Ar, KOH, 750 °C                                                                                                     | 67.1      | 2.3       | 0.39      | 18.9*     | -         | 0.41             | 0.21             | <sup>12</sup> |
| Rice husk, 450 °C, Ar, KOH, 750 °C                                                                                                     | 80.7      | 0.6       | 0.27      | 9.0*      | -         | 0.09             | 0.08             | <sup>12</sup> |
| Rice husk, 550 °C, Ar, KOH, 750 °C                                                                                                     | 77.3      | 1.0       | 0.44      | 7.7*      | -         | 0.15             | 0.07             | <sup>12</sup> |
| Tea waste, H <sub>3</sub> PO <sub>4</sub> , micro-                                                                                     | 66.2      | 3.8       | 1.63      | 28.4      | -         | 0.68             | 0.32             | <sup>14</sup> |

|                                                                                |      |      |      |       |   |      |      |               |
|--------------------------------------------------------------------------------|------|------|------|-------|---|------|------|---------------|
| wave, 300 °C, N <sub>2</sub>                                                   |      |      |      |       |   |      |      |               |
| Tea waste, H <sub>3</sub> PO <sub>4</sub> , micro-wave, 350 °C, N <sub>2</sub> | 76.3 | 3.2  | 1.44 | 19.0  | - | 0.50 | 0.19 | <sup>14</sup> |
| Tea waste, H <sub>3</sub> PO <sub>4</sub> , micro-wave, 550 °C, N <sub>2</sub> | 79.3 | 2.5  | 1.43 | 16.8  | - | 0.38 | 0.16 | <sup>14</sup> |
| Tea waste, H <sub>3</sub> PO <sub>4</sub> , micro-wave, 700 °C, N <sub>2</sub> | 70.0 | 1.8  | 2.10 | 26.1  | - | 0.31 | 0.28 | <sup>14</sup> |
| Palm shell, H <sub>2</sub> SO <sub>4</sub> , 700 °C, N <sub>2</sub>            | 83.3 | 0.4  | 0.2  | 16.1* | - | 0.06 | 0.15 | <sup>13</sup> |
| Almond shell, ZnCl <sub>2</sub> , 750 °C, N <sub>2</sub>                       | 79.2 | 0.64 | -    | 28.1* | - | 0.10 | 0.27 | <sup>15</sup> |
| Apricot stones, ZnCl <sub>2</sub> , 800 °C, N <sub>2</sub>                     | 76.0 | 0.49 | -    | 23.5* | - | 0.08 | 0.23 | <sup>15</sup> |
| Hazelnut shell, ZnCl <sub>2</sub> , 750 °C, N <sub>2</sub>                     | 72.0 | 1.8  | -    | 26.2* | - | 0.30 | 0.27 | <sup>15</sup> |
| Walnut shell, ZnCl <sub>2</sub> , 750 °C, N <sub>2</sub>                       | 75.3 | 0.71 | -    | 24.0* | - | 0.11 | 0.24 | <sup>15</sup> |

\*Oxygen content for samples MHH-2 and MHH-4 and other samples was calculated as the remainder.

**Table S2. CO<sub>2</sub> and CH<sub>4</sub> uptake (mmol/g), and apparent selectivities. Apparent selectivities are defined as  $(n_{CO_2}/n_x)/(P_{CO_2}/P_x)$ , where  $x = N_2$  or CH<sub>4</sub>, or  $(n_{CH_4}/n_{N_2})/(P_{CH_4}/P_{N_2})$ .**

| Name                                                                                                                    | MHH-2 | MHH-4 |
|-------------------------------------------------------------------------------------------------------------------------|-------|-------|
| CO <sub>2</sub> uptake, 1 bar, 0 °C                                                                                     | 3.20  | 5.27  |
| CO <sub>2</sub> uptake, 0.15 bar, 0 °C                                                                                  | 1.58  | 2.18  |
| CO <sub>2</sub> uptake, 1 bar, 50 °C                                                                                    | 1.50  | 1.88  |
| CO <sub>2</sub> uptake, 0.15 bar, 50 °C                                                                                 | 0.44  | 0.59  |
| CH <sub>4</sub> uptake, 1 bar, 0 °C                                                                                     | 1.06  | 2.09  |
| CH <sub>4</sub> uptake, 0.5 bar, 0 °C                                                                                   | 0.70  | 1.32  |
| CO <sub>2</sub> /N <sub>2</sub> Selectivity, 0 °C, P <sub>CO<sub>2</sub></sub> =0.15, P <sub>N<sub>2</sub></sub> =0.85  | 29.8  | 18.2  |
| CO <sub>2</sub> /N <sub>2</sub> Selectivity, 50 °C, P <sub>CO<sub>2</sub></sub> =0.15, P <sub>N<sub>2</sub></sub> =0.85 | 23.8  | 20.7  |
| CO <sub>2</sub> /CH <sub>4</sub> Selectivity, 0 °C, P <sub>CH<sub>4</sub></sub> =P <sub>CO<sub>2</sub></sub> =0.5       | 3.6   | 3.0   |
| CH <sub>4</sub> /N <sub>2</sub> Selectivity, 0 °C, P <sub>CH<sub>4</sub></sub> =P <sub>N<sub>2</sub></sub> =0.5         | 3.6   | 3.0   |



**Table S3. CO<sub>2</sub> uptake, selectivity and heat of adsorption comparison to other organic porous sorbents. Data were compiled from reviews and research papers.<sup>16–26</sup> (Note: typically higher adsorption is observed at lower temperature).**

| Name                                  | CO <sub>2</sub> uptake,<br>1 bar, 0 °C       | CO <sub>2</sub> uptake,<br>0.15 bar, 0 °C | Q <sub>st</sub> (kJ/mol)                                             | CO <sub>2</sub> -over-N <sub>2</sub><br>selectivity | Selectivity type                                    |                  |
|---------------------------------------|----------------------------------------------|-------------------------------------------|----------------------------------------------------------------------|-----------------------------------------------------|-----------------------------------------------------|------------------|
| MHH-2                                 | 3.2                                          | 1.58                                      | 32                                                                   | 23                                                  | 0 °C, 1 bar, IAST                                   |                  |
| MHH-4                                 | 5.27                                         | 2.18                                      | 43                                                                   | 65                                                  | 0 °C, 1 bar, IAST                                   |                  |
| Porous polymers                       |                                              |                                           |                                                                      |                                                     |                                                     |                  |
| HAT-CTF-450/600                       | 6.3                                          |                                           | 27                                                                   |                                                     |                                                     |                  |
| PPF-1                                 | 6.07                                         | 1.8                                       |                                                                      |                                                     |                                                     |                  |
| P-PCz                                 | 5.57                                         |                                           | 30.9                                                                 |                                                     |                                                     |                  |
| ALP-1                                 | 5.36                                         |                                           | 29.2                                                                 | 40                                                  | 0 °C, 1 bar, IAST                                   |                  |
| BILP-4                                | 5.34                                         | 1.99                                      |                                                                      |                                                     |                                                     |                  |
| TBILP-2                               | 5.18                                         |                                           | 29                                                                   |                                                     |                                                     |                  |
| BILP-3                                | 5.11                                         |                                           | 28.6                                                                 |                                                     |                                                     |                  |
| CPOP-1                                | 4.82                                         | 0.97                                      | 27                                                                   | 25                                                  | 0 °C, 1 bar, not specified                          |                  |
| PCTF-4                                | 4.66                                         |                                           | 30                                                                   |                                                     |                                                     |                  |
| APOP-3                                | 4.54                                         |                                           | 27.5                                                                 |                                                     |                                                     |                  |
| TNP <sub>4</sub>                      | 4.45                                         |                                           | 36.5                                                                 |                                                     |                                                     |                  |
| SNU-C1-sca                            | 4.38                                         |                                           | 31.2                                                                 |                                                     |                                                     |                  |
| Fe-POP-1                              | 4.3                                          | 1.48                                      |                                                                      |                                                     |                                                     |                  |
| PINK                                  | 4.3                                          |                                           | 28.9                                                                 |                                                     |                                                     |                  |
| fl-CTF <sub>350</sub>                 | 4.28                                         |                                           | 32.7                                                                 |                                                     |                                                     |                  |
| NOP-50A                               | 4.27                                         |                                           | 46.7                                                                 |                                                     |                                                     |                  |
| mPMF-5                                | 4.25                                         | 1.93                                      |                                                                      |                                                     |                                                     |                  |
| POF-1B                                | 4.19                                         | 1.51                                      |                                                                      |                                                     |                                                     |                  |
| C1M <sub>3</sub> -Al                  | 4.11                                         |                                           | 20.9                                                                 |                                                     |                                                     |                  |
| TSP-2                                 | 4.1                                          |                                           | 30.2                                                                 |                                                     |                                                     |                  |
| Network <sub>4</sub>                  | 3.96                                         |                                           | 30                                                                   |                                                     |                                                     |                  |
| MOP-C                                 | 3.86                                         | 1.08                                      |                                                                      |                                                     |                                                     |                  |
| CPOP-13                               | 3.82                                         |                                           | 34.2                                                                 |                                                     |                                                     |                  |
| HPF-1                                 | 3.8                                          |                                           | 26                                                                   | 120                                                 | 30 °C, 1 bar, IAST                                  |                  |
| Azo-CMP <sub>1</sub>                  | 3.72                                         |                                           | 30                                                                   |                                                     |                                                     |                  |
| TCP-B                                 | 3.66                                         |                                           | 24                                                                   |                                                     |                                                     |                  |
| TAPOP-1                               | 3.5                                          |                                           | 27.8                                                                 |                                                     |                                                     |                  |
| PECONF-3                              | 3.49                                         | 1.3                                       | 26                                                                   | 77                                                  | 0 °C, Ratio of Henry's law constants                |                  |
| PAN-T                                 | 3.36                                         |                                           | 36.3                                                                 |                                                     |                                                     |                  |
| POM <sub>2</sub> -IM                  | 3.3                                          |                                           | 31.1                                                                 |                                                     |                                                     |                  |
| PAF-18-OLi                            | 3.27                                         |                                           | 29.5                                                                 | 129                                                 | 0 °C, 1 bar, IAST                                   |                  |
| NAB-2                                 | 3.19                                         |                                           | 23                                                                   |                                                     |                                                     |                  |
| Azo-MOP-2                             | 3.06                                         |                                           |                                                                      |                                                     |                                                     |                  |
| Tet-4                                 | 3.03                                         |                                           |                                                                      |                                                     |                                                     |                  |
| NPOF-4-NH <sub>2</sub>                | 2.9                                          |                                           | 30.1                                                                 |                                                     |                                                     |                  |
| Azo-COP-2                             | 2.55                                         |                                           | 24.8                                                                 |                                                     |                                                     |                  |
| PON-1                                 | 2.48                                         |                                           |                                                                      |                                                     |                                                     |                  |
| DA-CMP <sub>1</sub>                   | 2.28                                         |                                           | 30                                                                   |                                                     |                                                     |                  |
| SNW-1                                 | 2.2                                          |                                           | 35                                                                   |                                                     |                                                     |                  |
| PPN-6-CH <sub>2</sub> -DETA           |                                              |                                           | 55                                                                   |                                                     |                                                     |                  |
| PPN-6-SO <sub>3</sub> NH <sub>4</sub> |                                              |                                           | 40                                                                   | 796                                                 | 40 °C, 1 bar, IAST                                  |                  |
| Activated carbons (ACs)               |                                              |                                           |                                                                      |                                                     |                                                     |                  |
| Name                                  | CO <sub>2</sub> uptake,<br>1 bar<br>(mmol/g) | Temperature<br>(°C)                       | CO <sub>2</sub> uptake,<br>0.15 bar<br>(temperature, °C)<br>(mmol/g) | Q <sub>st</sub><br>(kJ/mol)                         | CO <sub>2</sub> -over-N <sub>2</sub><br>selectivity | Selectivity type |
| AC petroleum pitch VR-5-M             | 8.6                                          | 0                                         |                                                                      |                                                     | 2.8                                                 |                  |
| AC pine-nut shell                     | 7.7                                          | 0                                         | 3.3 (0)                                                              | 23-42                                               |                                                     |                  |

|                            |         |    |          |       |      |                |
|----------------------------|---------|----|----------|-------|------|----------------|
| AC starch and gelatin      | 7.5     | 0  |          | 28-63 | 98   | Initial slopes |
| AC HTC algae               | 7.4     | 0  |          | 25    | 10   |                |
| TiC-CDC                    | 7.1     | 0  |          |       |      |                |
| AC bamboo                  | 7.0     | 0  | 2.5 (0)  |       |      |                |
| AC template CEM-750        | 6.9     | 0  |          |       |      |                |
| AC HTC sawdust             | 6.6-6.1 | 0  | 2.0 (0)  |       | 5.4  |                |
| AC petroleum pitch DO-88-M | 6.5     |    |          |       |      |                |
| AC palm shell              | 6.3     | 0  | 2.6 (0)  |       |      |                |
| MAC-E-7                    | 6       | 0  | 1.8 (0)  | 30    | 3.8  | IAST           |
| AC coconut shell           | 5.6     | 0  | 2.0 (0)  |       |      |                |
| AC fungi                   | 5.5     | 0  | 1.5 (0)  |       |      |                |
| AC chitosan                | 5.0     | 0  | 2.2 (0)  |       |      |                |
| AC from HTC                | 4.82    | 25 |          |       |      |                |
| AC yeast                   | 4.8     | 25 | 1.3 (25) |       |      |                |
| AC olive stone             | 4.8     | 0  |          |       |      |                |
| IBN9-NC1-A                 | 4.5     |    |          |       |      |                |
| AC PAN fiber               | 4.4     | 25 |          |       |      |                |
| Celtuce leaf               | 4.36    |    |          |       |      |                |
| AC evaporation             | 4.3     | 25 |          |       | 30   |                |
| AC bean dreg               | 4.2     | 25 | 1.4 (25) |       |      |                |
| KNC-A-K                    | 4.05    | 25 |          |       | 48   | IAST           |
| AC from polypyrrole        | 4.02    | 25 |          |       |      |                |
| AC-2-635                   | 3.86    |    |          |       |      |                |
| AC from CER                | 3.73    | 25 |          |       |      |                |
| AC phenolic resin          | 3.59    | 25 |          |       |      |                |
| AC-1-600                   | 3.57    |    |          |       |      |                |
| AC from PVF                | 3.52    | 25 |          |       |      |                |
| 3C-1000N                   | 3.25    |    |          |       |      |                |
| AC                         | 3.23    | 25 |          |       |      |                |
| N-rich AC                  | 3.2     |    |          |       |      |                |
| AC silica template         | 3.2     | 25 |          |       | 6.5  |                |
| AC soft templating         | 3       | 5  |          |       | 12.8 |                |
| AC olive stone             | 3       | 25 |          |       |      |                |
| AC-F30/470                 | 2.86    | 15 |          |       |      |                |
| AC almond shell            | 2.7     | 25 |          |       |      |                |
| AC                         | 2.61    | 25 |          |       |      |                |
| AC amidoxime               | 2.48    | 25 |          |       | 22.4 |                |
| AC Norit RB1               | 2.46    | 21 |          |       |      |                |
| AC                         | 2.45    | 15 |          |       |      |                |
| AC macroalgae              | 2.4     | 0  |          |       |      |                |
| AC                         | 2.25    | 25 |          |       |      |                |
| AC melamine-formaldehyde   | 2.25    | 25 |          |       |      |                |
| NiO-AC                     | 2.24    | 25 |          |       |      |                |
| AC almond shell            | 2.11    |    |          |       |      |                |
| AC from Alfa aesar         | 2.1     |    |          |       |      |                |
| AC                         | 2.07    | 25 |          |       |      |                |
| AC-A35/4                   | 2       | 20 |          |       |      |                |
| AC from ILP                | 1.95    | 25 |          |       |      |                |
| H-600                      | 1.73    |    |          |       |      |                |
| AC                         | 1.53    | 25 |          |       |      |                |
| Anthracite AC              | 1.38    | 30 |          |       |      |                |
| AC-RB                      | 1.22    | 30 |          |       |      |                |

**Table S4. Regression analyses of adsorption data and associated parameters for the parametrization of the adsorption data used in the IAST calculations. The coefficients a, b, c, and d relate to single and double component Langmuirians.**

| Name  | Temp (K) | Gas             | R-square | a     | Conf. 95% | b         | Conf. 95%  | c      | Conf. 95% | d        | Conf. 95% |
|-------|----------|-----------------|----------|-------|-----------|-----------|------------|--------|-----------|----------|-----------|
| MHH-2 | 273      | CO <sub>2</sub> | 0.9999   | 3.353 | ±0.062    | 0.001439  | ±0.000158  | 1.246  | ±0.092    | 0.0249   | ±0.00232  |
| MHH-2 | 283      | CO <sub>2</sub> | 1.0000   | 3.242 | ±0.039    | 0.001285  | ±0.000096  | 0.9047 | ±0.0623   | 0.01883  | ±0.00147  |
| MHH-2 | 293      | CO <sub>2</sub> | 1.0000   | 3.139 | ±0.039    | 0.001005  | ±0.000072  | 0.8544 | ±0.0551   | 0.01264  | ±0.00081  |
| MHH-2 | 323      | CO <sub>2</sub> | 1.0000   | 3.077 | ±0.101    | 0.0005182 | ±0.000077  | 0.5421 | ±0.1092   | 0.004449 | ±0.000581 |
| MHH-4 | 273      | CO <sub>2</sub> | 1.0000   | 7.335 | ±0.148    | 0.001028  | ±0.000083  | 1.585  | ±0.110    | 0.02035  | ±0.00178  |
| MHH-4 | 283      | CO <sub>2</sub> | 1.0000   | 5.454 | ±0.112    | 0.0008323 | ±0.000059  | 0.9732 | ±0.0646   | 0.01537  | ±0.00118  |
| MHH-4 | 293      | CO <sub>2</sub> | 1.0000   | 5.326 | ±0.120    | 0.0007195 | ±0.000054  | 0.7782 | ±0.0666   | 0.01143  | ±0.00102  |
| MHH-4 | 323      | CO <sub>2</sub> | 1.0000   | 4.795 | ±0.478    | 0.0004501 | ±0.000171  | 0.4636 | ±0.3688   | 0.003968 | ±0.00212  |
| MHH-2 | 273      | CH <sub>4</sub> | 0.9997   | 2.068 | ±0.068    | 0.001014  | ±0.000054  |        |           |          |           |
| MHH-4 | 273      | CH <sub>4</sub> | 0.9999   | 4.798 | ±0.105    | 0.0007591 | ±0.0000249 |        |           |          |           |
| MHH-2 | 273      | N <sub>2</sub>  | 0.9999   | 3.278 | ±0.129    | 0.0003031 | ±0.0000146 |        |           |          |           |
| MHH-2 | 323      | N <sub>2</sub>  | 0.9978   | 3.278 | FIXED     | 3.943E-5  | ±0.049E-5  |        |           |          |           |
| MHH-4 | 273      | N <sub>2</sub>  | 0.9999   | 3.285 | ±0.116    | 0.0003022 | ±0.0000130 |        |           |          |           |
| MHH-4 | 323      | N <sub>2</sub>  | 0.9962   | 3.285 | FIXED     | 6.145E-5  | ±0.1E-5    |        |           |          |           |

**Table S5. Heat of sorption determined from parameterized isosters ( $y=\ln p$ ,  $x=1/T$ ) of MHH-2. ( $y = ax^2 + bx + c$ )**

| Quantity Adsorbed (mmol/g) | a        | b     | c       | Heat of sorption (kJ/mol) |
|----------------------------|----------|-------|---------|---------------------------|
| 0.1                        | -3032744 | 17320 | -22.073 | 34.2                      |
| 0.2                        | -3597326 | 21398 | -28.634 | 33.5                      |
| 0.3                        | -4368249 | 26814 | -37.633 | 33.7                      |
| 0.4                        | -4786918 | 29807 | -42.597 | 33.4                      |
| 0.5                        | -5196255 | 32736 | -47.514 | 33.2                      |
| 0.6                        | -5270195 | 33286 | -48.268 | 32.9                      |
| 0.7                        | -5395659 | 34201 | -49.693 | 32.7                      |
| 0.8                        | -5473799 | 34771 | -50.516 | 32.5                      |
| 0.9                        | -5562748 | 35430 | -51.533 | 32.3                      |
| 1                          | -5588124 | 35636 | -51.760 | 32.1                      |
| 1.1                        | -5636748 | 36001 | -52.271 | 31.9                      |
| 1.2                        | -5595843 | 35736 | -51.682 | 31.7                      |
| 1.3                        | -5675251 | 36315 | -52.581 | 31.5                      |
| 1.4                        | -5581080 | 35672 | -51.336 | 31.3                      |
| 1.5                        | -5533120 | 35348 | -50.645 | 31.2                      |
| 1.6                        | -5376706 | 34255 | -48.601 | 31.1                      |
| 1.7                        | -5384882 | 34334 | -48.640 | 30.9                      |
| 1.8                        | -5496852 | 35151 | -49.999 | 30.7                      |
| 1.9                        | -5513932 | 35293 | -50.159 | 30.6                      |
| 2                          | -5531736 | 35451 | -50.373 | 30.3                      |
| 2.1                        | -5293292 | 33797 | -47.389 | 30.0                      |
| 2.2                        | -4795446 | 30275 | -41.046 | 30.1                      |
| 2.3                        | -4307403 | 26837 | -34.879 | 30.0                      |

The coefficients a, b, and c are presented with more numbers than are significant. Our estimation is that we can express the heat of sorption with three significant numbers.

**Table S6. Heat of sorption determined from parameterized isosters ( $y=\ln p$ ,  $x=1/T$ ) of MHH-4.**

| Quantity Adsorbed (mmol/g) | a         | b      | c       | Heat of sorption (kJ/mol) |
|----------------------------|-----------|--------|---------|---------------------------|
| 0.1                        | -9691340  | 63506  | -102.04 | 41.4                      |
| 0.2                        | -9803781  | 64351  | -102.86 | 41.0                      |
| 0.3                        | -10240328 | 67382  | -107.63 | 41.5                      |
| 0.4                        | -11184468 | 73997  | -118.85 | 41.9                      |
| 0.5                        | -11863976 | 78788  | -126.99 | 42.0                      |
| 0.6                        | -12766670 | 85152  | -137.95 | 42.2                      |
| 0.7                        | -13007702 | 86846  | -140.70 | 42.2                      |
| 0.8                        | -13401856 | 89623  | -145.40 | 42.3                      |
| 0.9                        | -13944835 | 93449  | -151.95 | 42.4                      |
| 1                          | -14344100 | 96272  | -156.78 | 42.4                      |
| 1.1                        | -14922461 | 100369 | -163.88 | 42.3                      |
| 1.2                        | -15517535 | 104580 | -171.19 | 42.3                      |
| 1.3                        | -15962006 | 107723 | -176.61 | 42.3                      |
| 1.4                        | -16296049 | 110077 | -180.63 | 42.3                      |
| 1.5                        | -16525711 | 111696 | -183.36 | 42.4                      |
| 1.6                        | -16723248 | 113086 | -185.69 | 42.4                      |
| 1.7                        | -17002769 | 115049 | -189.03 | 42.5                      |
| 1.8                        | -17174147 | 116251 | -191.04 | 42.6                      |
| 1.9                        | -17498850 | 118546 | -194.99 | 42.6                      |
| 2                          | -17967011 | 121854 | -200.73 | 42.6                      |
| 2.1                        | -18312143 | 124300 | -204.97 | 42.5                      |
| 2.2                        | -18635275 | 126581 | -208.90 | 42.5                      |
| 2.3                        | -19025875 | 129350 | -213.72 | 42.5                      |
| 2.4                        | -19485564 | 132620 | -219.45 | 42.3                      |
| 2.5                        | -19713032 | 134234 | -222.24 | 42.2                      |
| 2.6                        | -19762327 | 134565 | -222.71 | 42.4                      |
| 2.7                        | -19741052 | 134401 | -222.32 | 42.5                      |
| 2.8                        | -19639635 | 133674 | -220.94 | 42.6                      |
| 2.9                        | -19614918 | 133474 | -220.47 | 42.8                      |

The coefficients a, b, and c are presented with more numbers than are significant. Our estimation is that we can express the heat of sorption with three significant numbers.

## IAST calculations

Adsorption data was analyzed with Matlab's curve "fitting" routines using "custom equations" and the "Levenberg-Marquart" algorithm where the summed square deviations inbetween predicted adsorption and experimentally determined were minimized. For the CO<sub>2</sub> adsorption isotherms a two-component Langmuirian model was used, and for the N<sub>2</sub> and CH<sub>4</sub> adsorption a regular single-component Langmuir model was used.

Langmuir equation:  $y = abx/(1+bx)$ ;  $y$  is the adsorptive uptake,  $x$  is the pressure, and  $a$  and  $b$  are parameters.

Langmuir two-component:  $y = abx/(1+bx) + cdx/(1+dx)$ ,  $y$  is the adsorptive uptake,  $x$  is the pressure, and  $a$  and  $b$  are parameters.

The regression analyses were used as parameterization of the adsorptive uptake as expressed with the single- and two-component Langmuir equations. The values of the parameters are shown in Table S3 and used to parametrize the adsorption in the subsequent IAST modelling. The regression analyses of the adsorption data led to very high R-values as expected, but also the relatively wide 95%-confidential intervals of the involved parameters highlighted the importance of high quality adsorption data for IAST modelling. The error estimation was preformed from the variations in-between data and the model using Matlab's routines.

It was not possible to lock the amounts for the both components in the two-component Langmuir model for the CO<sub>2</sub> adsorption, which indicates that this model is not fully accurate. For the N<sub>2</sub> uptake, the max amount was locked to the value as determined at a temperature of 273K also for the temperature of 323K. The Toth-Langmuir combination was tested but did not produce robust results. The parameters from the associated regression analyses are presented in Table S3.

The IAST modelling was performed by using an in-house written code in Matlab. Shortly describe, in this code the Matlab's fsolve function was used to numerically solve the underlying equation in the IAST model by equating the corresponding pressure- and uptake-dependent integrals for the involved gas molecules. These codes can be supplied from the authors upon request.

For the CO<sub>2</sub>/N<sub>2</sub> gas pair the adsorptive selectivities were estimated with IAST using single component data recorded at 273 K and 323 K. The IAST calculations were performed with parametrized data. The estimated binary uptake (CO<sub>2</sub> over N<sub>2</sub>) is not reported but the binary selectivity is presented in the main manuscript as a function of the partial pressure of CO<sub>2</sub> in the gas phase ( $y_{CO_2}$ ). For the CO<sub>2</sub>/CH<sub>4</sub> gas pair, IAST calculations were performed with parametrized adsorption data recorded at 273 K. The binary selectivity is presented in the main manuscript as a function of  $y_{CO_2}$ . In a similar IAST calculations for the CH<sub>4</sub>-over-N selectivity was performed with parametrized adsorption data recorded at 273 K.

Binary uptake:  $S_1 = n_{(CO_2, IAST)}/n_{(N_2, IAST)}$  ;  $n_x$  = amount (mol) of gas adsorbed on the solid from a binary gas mixture.

Binary selectivity:  $S_{12} = n_{(CO_2, IAST)}/n_{(N_2, IAST)} * (p_{N_2}/p_{CO_2})$  ;  $p_x$  = the partial pressure of  $x$  in the gas mixture.

The  $S_{12}$  are presented as a function of the fraction of CO<sub>2</sub> in the gas phase ( $y_{CO_2}$ ) and calculated with the IAST. Apparent selectivities are presented in the Table S2 to allow for comparison with literature data.

## Heat of sorption calculations

The CO<sub>2</sub> adsorption isotherm data recorded at temperatures of 0, 10 and 20 °C were replotted as isosteres; In that representation, the values of  $\ln(p)$  were plotted as a function of  $1/T$  at defined adsorbed quantities (c.f. Figure S17 and S18). The heat of adsorption is proportional to the derivative of  $\ln(p)$  with respect to  $d(1/T)$  at a constant adsorbed quantity (or surface coverage  $\theta$ ).

However, in this study non-linearities were observed in the slope of the isosteres and therefore a quadratic function was parametrized to describe the  $(1/T)$  dependency of the  $\ln(p)$  for each series of data (at a fixed adsorbed quantity). The derivate of each quadratic function was performed at a temperature of  $T=10$  °C to calculate the loading-dependent isosteric heat of adsorption:

$$q_i = -d\ln(p)/d(1/T)_\theta R \quad ; \quad q_i = \text{isosteric heat of sorption, } R = 8.3144621 \text{ J/K/mol}$$

The heat of adsorption for CO<sub>2</sub> is presented as a function of quantity adsorbed in the main manuscript's Figure 11 for both MHH-2 and MHH-4. See Figure S17, Figure S18, Table S4 and Table S5 for further details.

## Dubinin-Radushkevich (DR) ultramicropore volume calculations

The used nomenclature is:

|                  |                                                                                                         |
|------------------|---------------------------------------------------------------------------------------------------------|
| V                | = adsorbed quantity at equilibrium pressure (cm <sup>3</sup> /g STP)                                    |
| V <sub>o</sub>   | = micropore capacity (cm <sup>3</sup> /g STP)                                                           |
| p <sub>o</sub>   | = saturation vapor pressure of gas at temperature T (mmHg)                                              |
| p                | = equilibrium pressure (mmHg)                                                                           |
| B                | = structural constant                                                                                   |
| β                | = convergence coefficient                                                                               |
| T                | = temperature                                                                                           |
| MV <sub>DR</sub> | = Micropore volume (cm <sup>3</sup> /g)                                                                 |
| D                | = density conversion factor = 0.001831 for CO <sub>2</sub> at 0 °C                                      |
| σ                | = molecular cross-sectional area (nm <sup>2</sup> ) = 0.170 nm <sup>2</sup> for CO <sub>2</sub> at 0 °C |

The CO<sub>2</sub> adsorption isotherms recorded at a temperature of 0 °C (adsorbed quantity in cm<sup>3</sup>/g (V) plotted as a function of partial pressure (p/p<sub>o</sub>)) were used for the DR calculations. p/p<sub>o</sub> in the range of 1.24 \* 10<sup>-5</sup> to 0.02 were used.

The DR equation can be written:

$$\log(V) = \log(V_o) - (B * T)/\beta * (\log(p_o/p))^2$$

Therefore, a plot of log(V) on the Y-axis and (log(p<sub>o</sub>/p))<sup>2</sup> on the x-axis can be created, see Figure S12. A linear least squares method was used, where the Y-intercept corresponds to log(V<sub>o</sub>) and the slope corresponds to -(B \* T)/β.

Micropore capacity:  $V_o = 10^{\log(V_o)}$

Micropore volume (cm<sup>3</sup>/g):  $MV_{DR} = V_o * D$

## BET surface area calculations

The used nomenclature is:

|                        |                                                                      |
|------------------------|----------------------------------------------------------------------|
| V                      | = adsorbed quantity at equilibrium pressure (cm <sup>3</sup> /g STP) |
| p <sub>o</sub>         | = saturation vapor pressure of gas at temperature T (mmHg)           |
| p                      | = equilibrium pressure (mmHg)                                        |
| p/p <sub>o</sub>       | = relative pressure                                                  |
| S                      | = slope                                                              |
| Y <sub>intercept</sub> | = Y-intercept                                                        |
| c                      | = BET constant                                                       |
| V <sub>m</sub>         | = monolayer adsorbed gas quantity                                    |
| N                      | = avogadro number = 6.023*10 <sup>23</sup>                           |
| V <sub>mol</sub>       | = molar volume of adsorbate gas = 22414 cm <sup>3</sup> /mol STP     |
| m                      | = mass of adsorbent (g)                                              |
| A                      | = cross-sectional area of adsorbing gas = 0.162 nm <sup>2</sup>      |
| S <sub>BET</sub>       | = BET specific surface area (m <sup>2</sup> /g)                      |

N<sub>2</sub> adsorption isotherm data collected at -196 °C is used to produce a BET-plot which has p/(V\*(p<sub>o</sub>-p)) on the Y-axis and p/p<sub>o</sub> on the X-axis. The points to be used in the BET-plot are here selected as to have v\*(1-p/p<sub>o</sub>) increasing with increasing p/p<sub>o</sub> and a positive c. A linear least squares method is used to yield the Y-intercept and slope in the BET-plot. The BET equation can be written as:

$$p/(V(p_o - p)) = (c-1)/(V_m * c) * p/p_o + 1/(V_m * c) \quad ; \text{ note: on the form } y=kx+m$$

Therefore, the slope and Y-intercept can be used to solve for c and V<sub>m</sub> using the following equations:

$$S = (c-1) / (V_m * c)$$

$$Y_{\text{intercept}} = 1 / (V_m * c)$$

$$V_m = 1 / (S + Y_{\text{intercept}})$$

The BET specific surface area is then calculated according to:

$$S_{BET} = (V_m * N * A) / (V_{mol} * m)$$

### ***t*-plot method for calculation of external surface area, micropore volume and micropore surface area**

The used nomenclature is:

|                        |                                                                      |
|------------------------|----------------------------------------------------------------------|
| $t_i$                  | = thickness for the $i$ :th point (Å)                                |
| $p_i$                  | = pressure for the $i$ :th point (mmHg)                              |
| $p_o$                  | = saturation vapor pressure of gas at temperature $T$ (mmHg)         |
| $p$                    | = equilibrium pressure (mmHg)                                        |
| $p/p_o$                | = relative pressure                                                  |
| $V$                    | = adsorbed quantity at equilibrium pressure (cm <sup>3</sup> /g STP) |
| $S$                    | = slope (cm <sup>3</sup> /g-Å STP)                                   |
| $Y_{\text{intercept}}$ | = Y-intercept                                                        |
| $S_{\text{ext}}$       | = external surface area (m <sup>2</sup> /g)                          |
| $S_{\text{mic}}$       | = micropore surface area (m <sup>2</sup> /g)                         |
| $S_{\text{BET}}$       | = BET specific surface area (m <sup>2</sup> /g)                      |
| $V_{\text{mic}}$       | = micropore volume (cm <sup>3</sup> /g)                              |
| $V_{\text{liq}}$       | = volume of adsorbed liquid                                          |
| $V_{\text{ads}}$       | = volume of adsorbed gas                                             |

N<sub>2</sub> adsorption isotherm data collected at -196 °C was used. The thickness of the adsorbed layer for each data point can be calculated according to ASTM standard D-6556-10 for carbon black.<sup>27,28</sup>

$$t_i = 0.88 \cdot (p_i/p_o)^2 + 6.45 \cdot (p_i/p_o) + 2.98$$

A plot with  $t_i$  on X-axis and  $V$  on the Y-axis gave the  $t$ -plot. Points were selected according to the ASTM standard for relative pressures 0.2-0.5, corresponding to  $t$ -values of 4.3-6.4. A linear least-squares method was used on these points to yield the Y-intercept and the slope. See Figure S20. For N<sub>2</sub> adsorption at -196 °C, the volume of adsorbed liquid is  $V_{\text{liq}} = 15.47$  \*  $V_{\text{ads}}$  and therefore:

$$\begin{aligned} S_{\text{ext}} &= S \cdot 15.47 \\ S_{\text{mic}} &= S_{\text{BET}} - S_{\text{ext}} \\ V_{\text{mic}} &= Y_{\text{intercept}} \cdot 0.001547 \end{aligned}$$

The equation for the calculation of the thickness of the adsorbed layer is different for different material types. One other commonly used equation is the Harkins-Jura equation (for Al<sub>2</sub>O<sub>3</sub>), presented below with a comparison of the result to that for the equation for carbon black.

$$t_i = (13.99 / (0.034 - \log(p_i/p_o)))^{1/2}$$

For the same used relative pressure range, there is only a slight difference:

$$\begin{aligned} V_{\text{mic, MHH-4, carbon black}} &= 0.350 \text{ cm}^3/\text{g} & V_{\text{mic, MHH-4, Harkins-Jura}} &= 0.348 \text{ cm}^3/\text{g} \\ S_{\text{ext, MHH-4, carbon black}} &= 173.56 \text{ cm}^2/\text{g} & S_{\text{ext, MHH-4, Harkins-Jura}} &= 177.05 \text{ cm}^2/\text{g} \end{aligned}$$

*Note: The selection of the relative pressure range may be ambiguous.*

### **Total pore volume calculation**

The used nomenclature is:

|                  |                                                                      |
|------------------|----------------------------------------------------------------------|
| $V_{\text{tot}}$ | = total pore volume (cm <sup>3</sup> /g)                             |
| $V$              | = adsorbed quantity at equilibrium pressure (cm <sup>3</sup> /g STP) |
| $p_o$            | = saturation vapor pressure of gas at temperature $T$ (mmHg)         |
| $p$              | = equilibrium pressure (mmHg)                                        |
| $p/p_o$          | = relative pressure                                                  |
| $V_{\text{mol}}$ | = molar volume of adsorbate gas = 22414 cm <sup>3</sup> /mol STP     |
| $M_{\text{N}_2}$ | = molecular weight of N <sub>2</sub> = 28.01 g/mol                   |
| $d_{\text{N}_2}$ | = density of liquid N <sub>2</sub> = 0.807 g/cm <sup>3</sup>         |

N<sub>2</sub> adsorption isotherm data collected at -196 °C was used. For the highest relative pressure point recorded ( $p/p_o = 0.98$ ), the adsorbed quantity of N<sub>2</sub> was used to calculate the total pore volume:

$$V_{\text{tot}} = V / V_{\text{mol}} \cdot M_{\text{N}_2} / d_{\text{N}_2} = V \cdot 0.001547$$



## References

- (1) Hara, M.; Yoshida, T.; Takagaki, A.; Takata, T.; Kondo, J. N.; Hayashi, S.; Domen, K. A Carbon Material as a Strong Protonic Acid. *Angew. Chemie - Int. Ed.* **2004**, 43 (22), 2955–2958.
- (2) Guo, F.; Xiu, Z. L.; Liang, Z. X. Synthesis of Biodiesel from Acidified Soybean Soapstock Using a Lignin-Derived Carbonaceous Catalyst. *Appl. Energy* **2012**, 98, 47–52.
- (3) Shrestha, R. M.; Varga, I.; Bajtai, J.; Varga, M. Design of Surface Functionalization of Waste Material Originated Charcoals by an Optimized Chemical Carbonization for the Purpose of Heavy Metal Removal from Industrial Waste Waters. *Microchem. J.* **2013**, 108, 224–232.
- (4) Liang, X.; Yang, J. Synthesis of a Novel Carbon Based Strong Acid Catalyst through Hydrothermal Carbonization. *Catal. Letters* **2009**, 132 (3–4), 460–463.
- (5) Girisuta, B.; Janssen, L. P. B. M.; Heeres, H. J. A Kinetic Study on the Decomposition of 5-Hydroxymethylfurfural into Levulinic Acid. *Green Chem.* **2006**, 8, 701.
- (6) Van Zandvoort, I.; Wang, Y.; Rasrendra, C. B.; Van Eck, E. R. H.; Bruijninx, P. C. a; Heeres, H. J.; Weckhuysen, B. M. Formation, Molecular Structure, and Morphology of Humins in Biomass Conversion: Influence of Feedstock and Processing Conditions. *ChemSusChem* **2013**, 6 (9), 1745–1758.
- (7) Summerskii, I. V.; Krutov, S. M.; Zarubin, M. Y. Humin-like Substances Formed under the Conditions of Industrial Hydrolysis of Wood. *Russ. J. Appl. Chem.* **2010**, 83 (2), 320–327.
- (8) Hoang, T. M. C.; van Eck, E. R. H.; Bula, W. P.; Gardeniers, J. G. E.; Lefferts, L.; Seshan, K. Humin Based By-Products from Biomass Processing as a Potential Carbonaceous Source for Synthesis Gas Production. *Green Chem.* **2015**, 17 (2), 959–972.
- (9) Luijkx, G. C. a; van Rantwijk, F.; van Bekkum, H. Hydrothermal Formation of 1, 2, 4-Benzenetriol from 5-Hydroxymethyl-2-Furaldehyde and D-Fructose. *Carbohydr. Res.* **1993**, 242 (C), 131–139.
- (10) Baugh, K. D.; McCarty, P. L. Thermochemical Pretreatment of Lignocellulose to Enhance Methane Fermentation: I. Monosaccharide and Furfurals Hydrothermal Decomposition and Product Formation Rates. *Biotechnol. Bioeng.* **1988**, 31 (1), 50–61.
- (11) Rice, J. a.; MacCarthy, P. Statistical Evaluation of the Elemental Composition of Humic Substances. *Org. Geochem.* **1991**, 17 (5), 635–648.
- (12) Nam, H.; Wang, S.; Jeong, H. R. TMA and H<sub>2</sub>S Gas Removals Using Metal Loaded on Rice Husk Activated Carbon for Indoor Air Purification. *Fuel* **2018**, 213 (October 2017), 186–194.
- (13) Guo, J.; Xu, W. S.; Chen, Y. L.; Lua, A. C. Adsorption of NH<sub>3</sub> onto Activated Carbon Prepared from Palm Shells Impregnated with H<sub>2</sub>SO<sub>4</sub>. *J. Colloid Interface Sci.* **2005**, 281 (2), 285–290.
- (14) Yagmur, E.; Ozmak, M.; Aktas, Z. A Novel Method for Production of Activated Carbon from Waste Tea by Chemical Activation with Microwave Energy. *Fuel* **2008**, 87 (15–16), 3278–3285.
- (15) Aygün, a.; Yenisoğlu-Karakaş, S.; Duman, I. Production of Granular Activated Carbon from Fruit Stones and Nutshells and Evaluation of Their Physical, Chemical and Adsorption Properties. *Microporous Mesoporous Mater.* **2003**, 66 (2–3), 189–195.
- (16) Hao, W.; Björnerbäck, F.; Trushkina, Y.; Oregui Bengoechea, M.; Salazar-Alvarez, G.; Barth, T.; Hedin, N. High-Performance Magnetic Activated Carbon from Solid Waste from Lignin Conversion Processes. 1. Their Use As Adsorbents for CO<sub>2</sub>. *ACS Sustain. Chem. Eng.* **2017**, 5 (4), 3087–3095.
- (17) Sevilla, M.; Falco, C.; Titirici, M.-M.; Fuertes, A. B. High-Performance CO<sub>2</sub> Sorbents from Algae. *RSC Adv.* **2012**, 2 (33), 12792.
- (18) Wahby, A.; Ramos-Fernández, J. M.; Martínez-Escandell, M.; Sepúlveda-Escribano, A.; Silvestre-Albero, J.; Rodríguez-Reinoso, F. High-Surface-Area Carbon Molecular Sieves for Selective CO<sub>2</sub> Adsorption. *ChemSusChem* **2010**, 3 (8), 974–981.
- (19) Sevilla, M.; Fuertes, A. B. Sustainable Porous Carbons with a Superior Performance for CO<sub>2</sub> Capture. *Energy Environ. Sci.* **2011**, 4 (5), 1765.
- (20) Creamer, A. E.; Gao, B. Carbon-Based Adsorbents for Postcombustion CO<sub>2</sub> Capture: A Critical Review. *Environ. Sci. Technol.* **2016**, 50 (14), 7276–7289.
- (21) Lee, S. Y.; Park, S. J. A Review on Solid Adsorbents for Carbon Dioxide Capture. *J. Ind. Eng. Chem.* **2015**, 23, 1–

- (22) Wang, W.; Zhou, M.; Yuan, D. Carbon Dioxide Capture in Amorphous Porous Organic Polymers. *J. Mater. Chem. A Mater. energy Sustain.* **2017**, *5*, 1334–1347.
- (23) Samanta, A.; Zhao, A.; Shimizu, G. K. H.; Sarkar, P.; Gupta, R. Post-Combustion CO<sub>2</sub> Capture Using Solid Sorbents: A Review. *Ind. Eng. Chem. Res.* **2012**, *51* (4), 1438–1463.
- (24) Deng, S.; Wei, H.; Chen, T.; Wang, B.; Huang, J.; Yu, G. Superior CO<sub>2</sub> Adsorption on Pine Nut Shell-Derived Activated Carbons and the Effective Micropores at Different Temperatures. *Chem. Eng. J.* **2014**, *253*, 46–54.
- (25) Alabadi, A.; Razzaque, S.; Yang, Y.; Chen, S.; Tan, B. Highly Porous Activated Carbon Materials from Carbonized Biomass with High CO<sub>2</sub> Capturing Capacity. *Chem. Eng. J.* **2015**, *281*, 606–612.
- (26) Xu, C.; Hedin, N. Microporous Adsorbents for CO<sub>2</sub> Capture – a Case for Microporous Polymers? *Mater. Today* **2014**, *17* (8), 397–403.
- (27) Lowell, S.; Shields, J. E.; Thomas, M. A.; Thommes, M. *Characterization of Porous Solids and Powders: Surface Area, Pore Size and Density*; 2004; Vol. 16.
- (28) ASTM International. *Standard Test Method for Carbon Black — Total and External Surface Area by Nitrogen*; 2012; Vol. D6556.
